# Supplementary material
Source: publisher figshare collection journal article supplement (https://acs.figshare.com/ndownloader/files/9698113)
Supplement: Supplementary file 1 [file 9698113]

# Supporting Information

## Electrooxidative C(sp<sup>3</sup>)-H Amination of Azoles via Intermolecular Oxidative C(sp<sup>3</sup>)-H/N-H Cross-Coupling

Jiwei Wu<sup>†</sup>, Yi Zhou<sup>†</sup>, Yuchen Zhou<sup>†</sup>, Chien-Wei Chiang<sup>†</sup>, Aiwen Lei<sup>\*†‡</sup>

<sup>†</sup> The Institute for Advanced Studies (IAS), College of Chemistry and Molecular Sciences, Wuhan University, Wuhan 430072, P. R. China; <sup>‡</sup> State Key Laboratory for Oxo Synthesis and Selective Oxidation, Lanzhou Institute of Chemical Physics, Chinese Academy of Sciences, Lanzhou 730000, P. R. China. \*Email: aiwenlei@whu.edu.cn

|                                                 |            |
|-------------------------------------------------|------------|
| <b>1. General information.....</b>              | <b>S2</b>  |
| <b>2. Experimental procedure.....</b>           | <b>S2</b>  |
| <b>3. Additional experiments.....</b>           | <b>S4</b>  |
| <b>4. Proposed mechanism.....</b>               | <b>S6</b>  |
| <b>5. Detail descriptions for products.....</b> | <b>S6</b>  |
| <b>6. Copies of product NMR spectra.....</b>    | <b>S14</b> |
| <b>7. References.....</b>                       | <b>S39</b> |

## 1. General information

All glassware was oven dried at 110 °C for hours and cooled down under vacuum. Unless otherwise noted, materials were obtained from commercial suppliers and used without further purification. The instrument for electrolysis is dual display potentiostat (DJS-292B) (made in China). The anode electrode and cathode electrode all are Pt (1.5×1.5 cm<sup>2</sup>). Cyclic voltammograms were obtained on a CHI 605E potentiostat. Thin layer chromatography (TLC) employed glass 0.25 mm silica gel plates. Flash chromatography columns were packed with 200-300 mesh silica gel in petroleum (bp. 60-90 °C). GC-MS spectra were recorded on Varian GC MS 3900-2100T or SHIMADZU GC MS-2010. <sup>1</sup>H and <sup>13</sup>C NMR data were recorded with Bruker Advance III (400 MHz) spectrometers with tetramethylsilane as an internal standard. All chemical shifts (δ) are reported in ppm and coupling constants (*J*) in Hz. All chemical shifts were reported relative to tetramethylsilane (0 ppm for <sup>1</sup>H), CDCl<sub>3</sub> (77.0 ppm for <sup>13</sup>C).

## 2. Experimental Procedures

**2.1 General procedure for the electrooxidative C(sp<sup>3</sup>)-H amination of azoles with tetrahydrofuran:** In an oven-dried undivided three-necked bottle (25 mL) equipped with a stir bar, azoles (0.3 mmol) and <sup>n</sup>Bu<sub>4</sub>NBF<sub>4</sub> (65.85 mg, 0.2 mmol) were combined and added. The bottle was equipped with platinum electrodes (1.5 × 1.5 cm<sup>2</sup>) as both the anode and cathode and was then charged with nitrogen. Under the protection of N<sub>2</sub>, CH<sub>3</sub>CN (8 mL) and tetrahydrofuran (2 mL) were injected respectively into the tubes via syringes. The reaction mixture was stirred and electrolyzed at a constant current of 12 mA at 80 °C for 3-5 h. When the reaction was finished, the reaction mixture was washed with water and extracted with diethyl ether (10 mL x 3). The organic layers were combined, dried over Na<sub>2</sub>SO<sub>4</sub>, and concentrated. The pure product was obtained by flash column chromatography on silica gel.

**2.2 General procedure for the electrooxidative C(sp<sup>3</sup>)-H amination of 1H-benzotriazole with other C(sp<sup>3</sup>)-H sources:** In an oven-dried undivided three-necked bottle (25 mL) equipped with a stir bar, 1H-benzotriazole (35.74 mg, 0.3 mmol) and <sup>n</sup>Bu<sub>4</sub>NBF<sub>4</sub> (65.85 mg, 0.2 mmol) were combined and added. The bottle was equipped with platinum electrodes (1.5×1.5 cm<sup>2</sup>) as both the anode and cathode and was then charged with nitrogen. Under the protection of N<sub>2</sub>, CH<sub>3</sub>CN (10 mL) and other C(sp<sup>3</sup>)-H sources (10 equiv.) were injected respectively into the tubes via syringes.

The reaction mixture was stirred and electrolyzed at a constant current of 12 mA at 80 °C for 3 h. When the reaction was finished, the reaction mixture was washed with water and extracted with diethyl ether (10 mL x 3). The organic layers were combined, dried over Na<sub>2</sub>SO<sub>4</sub>, and concentrated. The pure product was obtained by flash column chromatography on silica gel.

**Procedure for gram scale synthesis:** In an oven-dried undivided three-necked bottle (250 mL) equipped with a stir bar, 1H-benzotriazole (1.19 g, 10 mmol) and <sup>n</sup>Bu<sub>4</sub>NBF<sub>4</sub> (987.81 mg, 3 mmol) were combined and added. The bottle was equipped with platinum electrodes (1.5×1.5 cm<sup>2</sup>) as both the anode and cathode and was then charged with nitrogen. Under the protection of N<sub>2</sub>, CH<sub>3</sub>CN (60 mL) and tetrahydrofuran (40 mL) were injected respectively into the tubes via syringes. The reaction mixture was stirred and electrolyzed at a constant current of 60 mA at 80 °C for 24 h. When the reaction was finished, the reaction mixture was washed with water and extracted with diethyl ether (100 mL x 3). The organic layers were combined, dried over Na<sub>2</sub>SO<sub>4</sub>, and concentrated. The pure product was obtained by flash column chromatography on silica gel.

**Table S1.** Optimization of the reaction conditions.<sup>a</sup>

1a + 2a  $\xrightarrow[\text{undivided cell}]{\text{Pt (-) | Pt (+) : I = 12 mA, } ^n\text{Bu}_4\text{NBF}_4, \text{CH}_3\text{CN, 3 h, 80 } ^\circ\text{C, N}_2}$  3a + 4a

| Entry | Variation from the standard conditions                                                                  | Yield of <b>3a</b> (%) <sup>b</sup> |
|-------|---------------------------------------------------------------------------------------------------------|-------------------------------------|
| 1     | Pt (-)   C (+) instead of Pt (-)   Pt (+)                                                               | 51                                  |
| 2     | C (-)   C (+) instead of Pt (-)   Pt (+)                                                                | trace                               |
| 3     | Ni (-)   C (+) instead of Pt (-)   Pt (+)                                                               | 38                                  |
| 4     | <sup>n</sup> Bu <sub>4</sub> NClO <sub>4</sub> instead of <sup>n</sup> Bu <sub>4</sub> NBF <sub>4</sub> | 84                                  |
| 5     | <sup>n</sup> Bu <sub>4</sub> NHSO <sub>4</sub> instead of <sup>n</sup> Bu <sub>4</sub> NBF <sub>4</sub> | 69                                  |
| 6     | <sup>n</sup> Bu <sub>4</sub> NI instead of <sup>n</sup> Bu <sub>4</sub> NBF <sub>4</sub>                | n.d.                                |
| 7     | <sup>n</sup> Et <sub>4</sub> NBF <sub>4</sub> instead of <sup>n</sup> Bu <sub>4</sub> NBF <sub>4</sub>  | 88                                  |
| 8     | DCE instead of CH <sub>3</sub> CN                                                                       | 71                                  |
| 9     | DMSO instead of CH <sub>3</sub> CN                                                                      | trace                               |
| 10    | H <sub>2</sub> O instead of CH <sub>3</sub> CN                                                          | n.d.                                |
| 11    | EtOH instead of CH <sub>3</sub> CN                                                                      | n.d.                                |

<sup>a</sup> Reaction conditions: Pt anode, Pt cathode, constant current = 12 mA, **1a** (0.3 mmol), **2a** (2.0 mL), <sup>n</sup>Bu<sub>4</sub>NBF<sub>4</sub> (0.2 mmol), in 8.0 mL CH<sub>3</sub>CN at 80 °C under N<sub>2</sub> for 3 h. <sup>b</sup> Yields shown are of isolated products. RT = room temperature. n.d. = not detected.

### 3. Additional experiments

#### 3.1 Cyclic voltammetry of 1a, 3a and 2a.

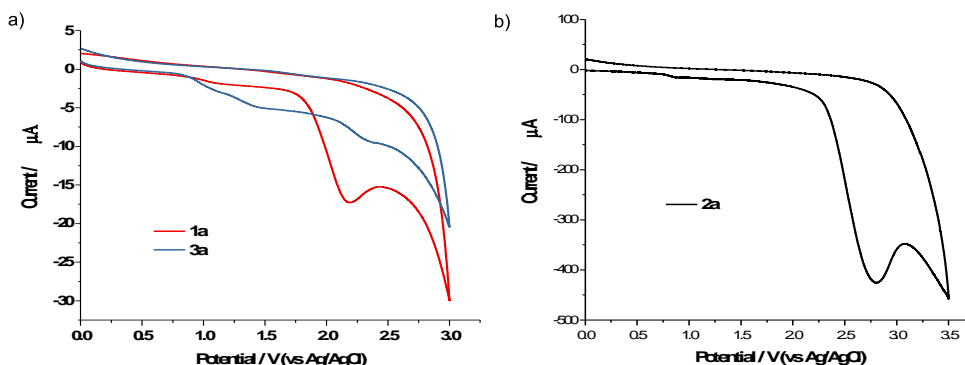

**Figure S1.** a) Cyclic voltammetry of **1a** and **3a** in CH<sub>3</sub>CN with <sup>n</sup>Bu<sub>4</sub>NBF<sub>4</sub> (0.2 mmol) under nitrogen at a platinum-disk electrode at a scan rate of  $\nu = 0.1 \text{ Vs}^{-1}$ . b) Cyclic voltammetry of **2a** in CH<sub>3</sub>CN with <sup>n</sup>Bu<sub>4</sub>NBF<sub>4</sub> (0.2 mmol) under nitrogen at a platinum-disk electrode at a scan rate of  $\nu = 0.1 \text{ Vs}^{-1}$ .

#### 3.2 KIE Determined with Two Parallel Reactions:

**General procedure and results:** In two oven-dried undivided three-necked bottle (25 mL) equipped with a stir bar, 1H-benzotriazole (35.74 mg, 0.3 mmol), <sup>n</sup>Bu<sub>4</sub>NBF<sub>4</sub> (65.85 mg, 0.2 mmol) and were combined and added. The bottle was equipped with platinum electrodes (1.5×1.5 cm<sup>2</sup>) as both the anode and cathode and was then charged with nitrogen. Under the protection of N<sub>2</sub>, CH<sub>3</sub>CN (8 mL) tetrahydrofuran (2 mL) and *d*<sub>8</sub>-tetrahydrofuran (2 mL) were injected respectively into the tubes via syringes. The reaction mixture was stirred and electrolyzed at a constant current of 12 mA at 80 °C for 1 h. When the reaction was finished, the reaction mixture was washed with water and extracted with diethyl ether (10 mL x 3). The organic layers were combined, dried over Na<sub>2</sub>SO<sub>4</sub>, and concentrated. The pure product was obtained by flash column chromatography on silica gel. As a result, the desired coupling products were obtained in 42% and 39% yields, respectively, in which  $k_H/k_D = 1.07$ .

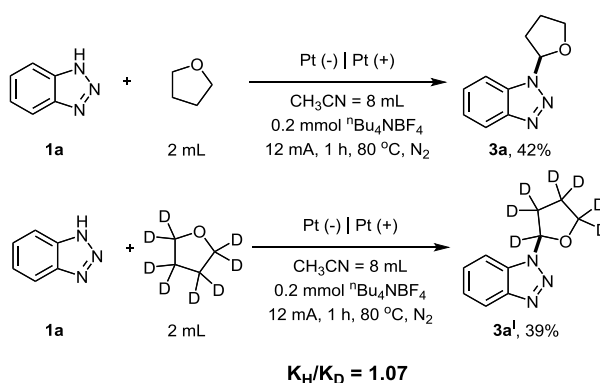

### 3.3 Intermolecular Kinetic Isotopic Effect (KIE)

**General procedure and characterization spectrum:** In an oven-dried undivided three-necked bottle (25 mL) equipped with a stir bar, 1H-benzotriazole (35.74 mg, 0.3 mmol),  $^n\text{Bu}_4\text{NBF}_4$  (65.85 mg, 0.2 mmol) and were combined and added. The bottle was equipped with platinum electrodes ( $1.5 \times 1.5 \text{ cm}^2$ ) as both the anode and cathode and was then charged with nitrogen. Under the protection of  $\text{N}_2$ ,  $\text{CH}_3\text{CN}$  (8 mL), tetrahydrofuran (1 mL) and  $d_8$ -tetrahydrofuran (1 mL) were injected into the tubes via syringes. The reaction mixture was stirred and electrolyzed at a constant current of 12 mA at  $80^\circ\text{C}$  for 1 h. When the reaction was finished, the reaction mixture was washed with water and extracted with diethyl ether (10 mL x 3). The organic layers were combined, dried over  $\text{Na}_2\text{SO}_4$ , and concentrated. The pure product was obtained by flash column chromatography on silica gel with a total yield of 27% and detected by  $^1\text{H}$  NMR to determine the exact KIE value. From the following  $^1\text{H}$  NMR spectrum, we can calculate the KIE value to be  $k_H/k_D = 0.55/0.45 = 1.22$

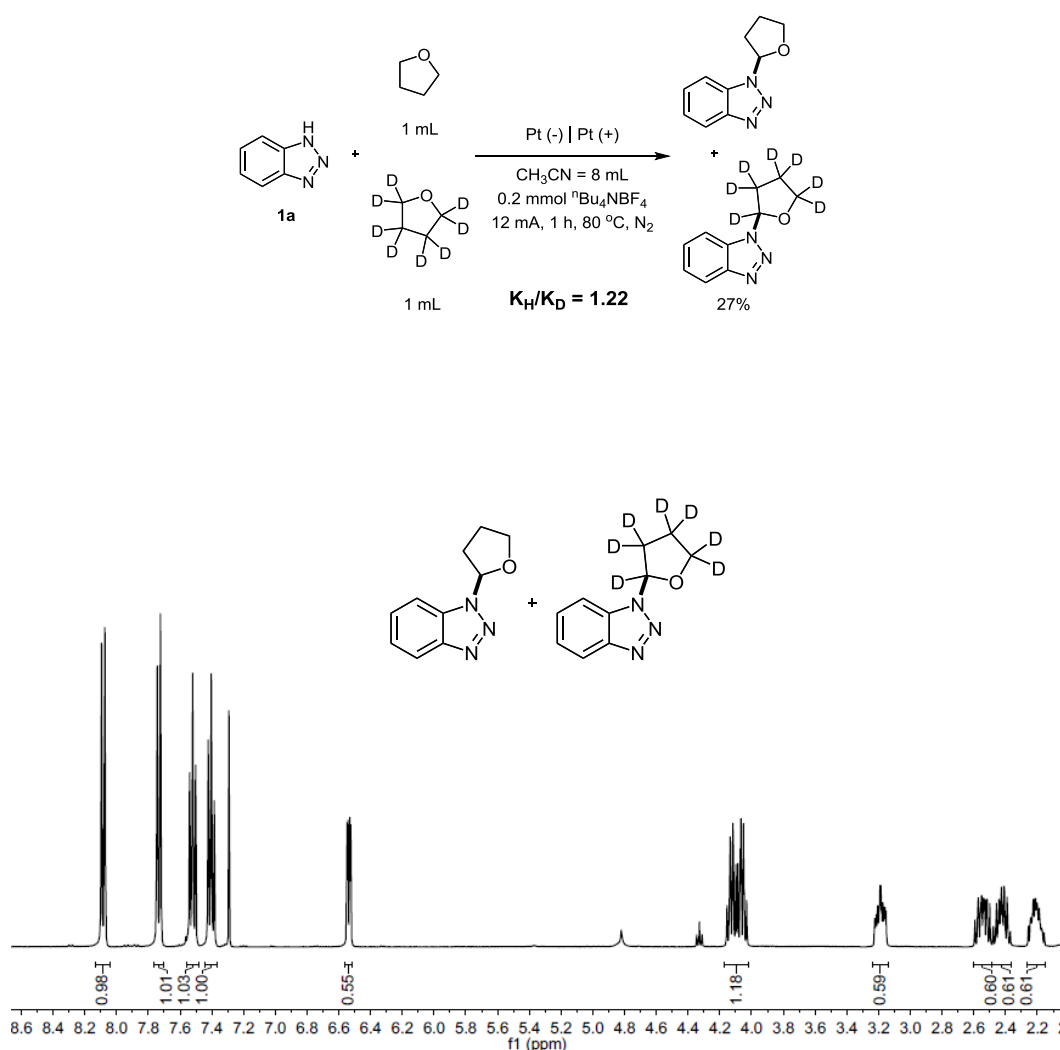

## 4. Proposed mechanism

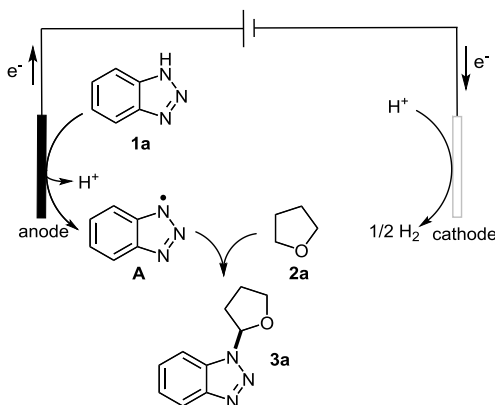

**Scheme S1.** Proposed mechanism.

## 5. Detail descriptions for products

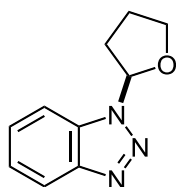

**1-(Tetrahydrofuran-2-yl)-1H-benzo[d][1,2,3]triazole (3a)**<sup>[1]</sup>: 52.2 mg, yield: 92%.

<sup>1</sup>H NMR (400 MHz, CDCl<sub>3</sub>)  $\delta$  8.06 (d,  $J$  = 8.4 Hz, 1H), 7.71 (d,  $J$  = 8.3 Hz, 1H), 7.49 (t,  $J$  = 7.2 Hz, 1H), 7.37 (t,  $J$  = 7.2 Hz, 1H), 6.51 (dd,  $J$  = 6.8, 2.4 Hz, 1H), 4.14 – 3.99 (m, 2H), 3.19 – 3.10 (m, 1H), 2.57 – 2.46 (m, 1H), 2.45 – 2.33 (m, 1H), 2.23 – 2.13 (m, 1H).

<sup>13</sup>C NMR (101 MHz, CDCl<sub>3</sub>)  $\delta$  146.37, 132.82, 127.53, 124.15, 119.86, 110.45, 87.89, 69.32, 30.83, 24.44.

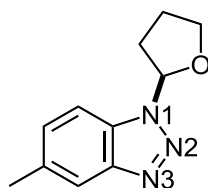

**5-Methyl-1-(tetrahydrofuran-2-yl)-1H-benzo[d][1,2,3]triazole and 6-Methyl-1-(tetrahydrofuran-2-yl)-1H-benzo[d][1,2,3]triazole (3b, N1/N3 = 1/1.6)**: 56.7 mg, yield: 93%.

<sup>1</sup>H NMR (400 MHz, CDCl<sub>3</sub>)  $\delta$  7.92 (d,  $J$  = 8.5 Hz, 1.00H), 7.81 (s, 0.64H), 7.58 (d,  $J$  = 8.5 Hz, 0.67H), 7.47 (s, 1.00H), 7.32 (d,  $J$  = 7.5 Hz, 0.66H), 7.20 (d,  $J$  = 8.5 Hz, 1.02H), 6.47 (t,  $J$  = 7.0 Hz, 1.67H), 4.12 – 3.99 (m, 3.49H), 3.21 – 3.09 (m, 1.74H), 2.52 (d,  $J$  = 8.6 Hz, 5.89H), 2.47 – 2.35 (m, 2.81H), 2.23 – 2.12 (m, 1.78H).

<sup>13</sup>C NMR (101 MHz, CDCl<sub>3</sub>)  $\delta$  146.99, 145.06, 138.17, 134.15, 133.31, 131.32, 129.68, 126.43, 119.29, 118.78, 109.95, 109.61, 87.91, 87.65, 69.25, 30.81, 30.65, 24.48, 24.45, 22.07, 21.54.

HRMS (ESI) calculated for C<sub>11</sub>H<sub>13</sub>N<sub>3</sub>O [M+Na]<sup>+</sup>: 226.0951; found: 226.0956.

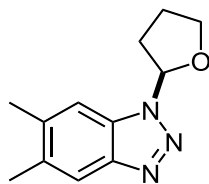

**5,6-Dimethyl-1-(tetrahydrofuran-2-yl)-1H-benzo[d][1,2,3]triazole (3c)**<sup>[1]</sup>: 54.1 mg, yield: 83%.  
<sup>1</sup>H NMR (400 MHz, CDCl<sub>3</sub>) δ 7.78 (s, 1H), 7.45 (s, 1H), 6.45 (dd, *J* = 6.7, 2.5 Hz, 1H), 4.12 – 4.05 (m, 1H), 4.04 – 3.97 (m, 1H), 3.20 – 3.10 (m, 1H), 2.54 – 2.35 (m, 8H), 2.21 – 2.11 (m, 1H).  
<sup>13</sup>C NMR (101 MHz, CDCl<sub>3</sub>) δ 145.66, 137.86, 133.89, 131.88, 118.91, 109.84, 87.68, 69.18, 30.63, 24.48, 21.00, 20.48.

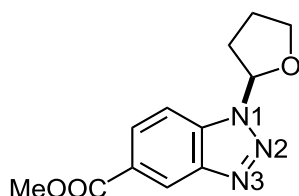

**Methyl-1-(tetrahydrofuran-2-yl)-1H-benzo[d][1,2,3]triazole-5-carboxylate and Methyl 1-(tetrahydrofuran-2-yl)-1H-benzo[d][1,2,3]triazole-6-carboxylate (3d, N1/N3 = 1/3.7)**: 44.5 mg, yield: 60%.

<sup>1</sup>H NMR (400 MHz, CDCl<sub>3</sub>) δ 8.79 (s, 1.00H), 8.49 (s, 0.27H), 8.19 (d, *J* = 8.7 Hz, 1.11H), 8.08 (q, *J* = 8.7 Hz, 0.59H), 7.75 (d, *J* = 8.7 Hz, 1.13H), 6.57 (dd, *J* = 6.7, 1.9 Hz, 0.32H), 6.53 (dd, *J* = 6.7, 1.9 Hz, 1.09H), 4.16 – 4.03 (m, *J* = 28.1, 7.9 Hz, 3.19H), 3.99 (s, 4.29H), 3.21 – 3.14 (m, 1.49H), 2.61 – 2.48 (m, 1.49H), 2.44 – 2.33 (m, 1.64H), 2.23 – 2.16 (m, 1.52H).  
<sup>13</sup>C NMR (101 MHz, CDCl<sub>3</sub>) δ 166.67, 148.42, 146.16, 135.21, 132.64, 129.31, 128.39, 126.56, 124.96, 122.81, 119.79, 113.32, 110.50, 88.33, 69.57, 52.55, 31.06, 24.37.

HRMS (ESI) calculated for C<sub>12</sub>H<sub>13</sub>N<sub>3</sub>O<sub>3</sub> [M+Na]<sup>+</sup>: 270.0849; found: 270.0855.

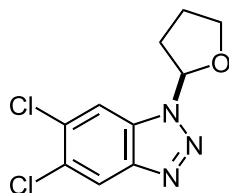

**5,6-Dichloro-1-(tetrahydrofuran-2-yl)-1H-benzo[d][1,2,3]triazole (3e)**: 33.2 mg, yield: 43%.  
<sup>1</sup>H NMR (400 MHz, CDCl<sub>3</sub>) δ 8.18 (s, 1H), 7.91 (s, 1H), 6.44 (dd, *J* = 6.7, 2.1 Hz, 1H), 4.13 (q, *J* = 7.8 Hz, 1H), 4.07 – 3.99 (m, 1H), 3.23 – 3.16 (m, 1H), 2.60 – 2.48 (m, 1H), 2.37 – 2.29 (m, 1H), 2.27 – 2.14 (m, 1H).  
<sup>13</sup>C NMR (101 MHz, CDCl<sub>3</sub>) δ 145.34, 132.70, 131.94, 129.03, 120.76, 112.22, 88.80, 69.62, 31.03, 24.18.

HRMS (EI) calculated for C<sub>10</sub>H<sub>9</sub>Cl<sub>2</sub>N<sub>3</sub>O (M): 257.0123; found: 257.0132.

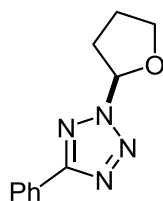

**5-Phenyl-2-(tetrahydrofuran-2-yl)-2H-tetrazole (3f)**<sup>[2]</sup>: 54.5 mg, yield: 84%.

$^1\text{H}$  NMR (400 MHz,  $\text{CDCl}_3$ )  $\delta$  8.19 (dd,  $J$  = 7.4, 2.3 Hz, 2H), 7.51 (dq,  $J$  = 7.3, 2.7, 2.1 Hz, 3H), 6.61 (dd,  $J$  = 6.5, 2.1 Hz, 1H), 4.34 – 4.27 (m, 1H), 4.20 – 4.13 (m, 1H), 2.77 – 2.67 (m, 1H), 2.60 – 2.47 (m, 2H), 2.25 – 2.14 (m, 1H).

$^{13}\text{C}$  NMR (101 MHz,  $\text{CDCl}_3$ )  $\delta$  165.26, 130.47, 128.96, 127.45, 127.04, 91.77, 70.35, 31.96, 24.15.

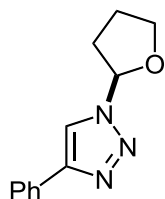

**4-Phenyl-1-(tetrahydrofuran-2-yl)-1H-1,2,3-triazole (3g)**<sup>[3]</sup>: 57.4 mg, yield: 89%.

$^1\text{H}$  NMR (400 MHz,  $\text{CDCl}_3$ )  $\delta$  7.91 (s, 1H), 7.83 (d,  $J$  = 7.1 Hz, 2H), 7.46 (t,  $J$  = 7.5 Hz, 2H), 7.38 (t,  $J$  = 7.4 Hz, 1H), 6.37 (dd,  $J$  = 6.7, 2.5 Hz, 1H), 4.27 – 4.20 (m, 1H), 4.12 – 4.06 (m, 1H), 2.77 – 2.69 (m, 1H), 2.52 – 2.41 (m, 2H), 2.17 – 2.10 (m, 1H).

$^{13}\text{C}$  NMR (101 MHz,  $\text{CDCl}_3$ )  $\delta$  148.12, 131.48, 130.38, 128.89, 128.58, 126.09, 92.39, 69.65, 31.43, 24.56.

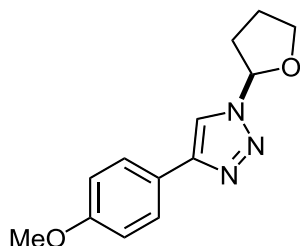

**4-(4-Methoxyphenyl)-1-(tetrahydrofuran-2-yl)-1H-1,2,3-triazole (3h)**: 44.1 mg, yield: 60%.

$^1\text{H}$  NMR (400 MHz,  $\text{CDCl}_3$ )  $\delta$  7.82 (s, 1H), 7.75 (d,  $J$  = 8.9 Hz, 2H), 6.98 (d,  $J$  = 8.8 Hz, 2H), 6.34 (dd,  $J$  = 6.7, 2.5 Hz, 1H), 4.25 – 4.17 (m, 1H), 4.12 – 4.03 (m, 1H), 3.86 (s, 3H), 2.77 – 2.67 (m, 1H), 2.54 – 2.37 (m, 2H), 2.18 – 2.05 (m, 1H).

$^{13}\text{C}$  NMR (101 MHz,  $\text{CDCl}_3$ )  $\delta$  159.92, 148.01, 131.01, 127.42, 123.06, 114.29, 92.28, 69.61, 55.40, 31.37, 24.61.

HRMS (ESI) calculated for  $\text{C}_{13}\text{H}_{15}\text{N}_3\text{O}_2$   $[\text{M}+\text{Na}]^+$ : 268.1056; found: 268.1071.

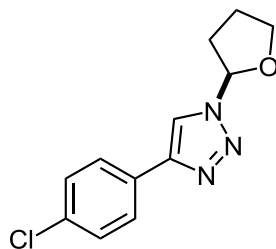

**4-(4-Chlorophenyl)-1-(tetrahydrofuran-2-yl)-1H-1,2,3-triazole (3i)**: 55.3 mg, yield: 74%.

$^1\text{H}$  NMR (400 MHz,  $\text{CDCl}_3$ )  $\delta$  7.88 (s, 1H), 7.76 (d,  $J$  = 8.5 Hz, 2H), 7.42 (d,  $J$  = 8.5 Hz, 2H), 6.35 (dd,  $J$  = 6.6, 2.4 Hz, 1H), 4.22 (q,  $J$  = 7.7 Hz, 1H), 4.09 (q,  $J$  = 7.7 Hz, 1H), 2.77 – 2.67 (m, 1H), 2.55 – 2.39 (m, 2H), 2.20 – 2.06 (m, 1H).

$^{13}\text{C}$  NMR (101 MHz,  $\text{CDCl}_3$ )  $\delta$  147.14, 134.41, 131.46, 129.16, 128.94, 127.38, 92.52, 69.76, 31.49, 24.59.

HRMS (ESI) calculated for  $\text{C}_{12}\text{H}_{12}\text{ClN}_3\text{O}$   $[\text{M}+\text{Na}]^+$ : 273.0561; found: 273.0567.

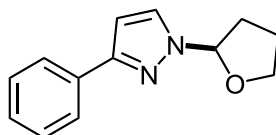



**3-Phenyl-1-(tetrahydrofuran-2-yl)-1H-pyrazole (3j)**<sup>[3]</sup>: 58.5 mg, yield: 91%.

<sup>1</sup>H NMR (400 MHz, CDCl<sub>3</sub>) δ 7.86 (d, *J* = 7.1 Hz, 2H), 7.61 (d, *J* = 2.4 Hz, 1H), 7.43 (t, *J* = 7.5 Hz, 2H), 7.34 (t, *J* = 7.4 Hz, 1H), 6.61 (d, *J* = 2.4 Hz, 1H), 6.06 (dd, *J* = 6.6, 2.5 Hz, 1H), 4.24 – 4.19 (m, 1H), 4.04 (q, *J* = 7.3 Hz, 1H), 2.74 – 2.67 (m, 1H), 2.43 – 2.32 (m, 1H), 2.30 – 2.21 (m, 1H), 2.13 – 2.02 (m, 1H).

<sup>13</sup>C NMR (101 MHz, CDCl<sub>3</sub>) δ 151.95, 133.68, 129.25, 128.62, 127.70, 125.76, 102.96, 90.32, 69.39, 32.02, 24.44.

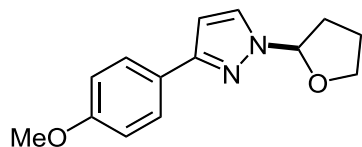

**3-(4-Methoxyphenyl)-1-(tetrahydrofuran-2-yl)-1H-pyrazole (3k)**: 67.4 mg, yield: 92%.

<sup>1</sup>H NMR (400 MHz, CDCl<sub>3</sub>) δ 7.77 (d, *J* = 8.8 Hz, 2H), 7.58 (d, *J* = 2.4 Hz, 1H), 6.96 (d, *J* = 8.8 Hz, 2H), 6.52 (d, *J* = 2.4 Hz, 1H), 6.04 (dd, *J* = 6.6, 2.6 Hz, 1H), 4.20 (td, *J* = 7.9, 5.5 Hz, 1H), 4.03 (q, *J* = 7.4 Hz, 1H), 3.86 (s, 3H), 2.73 – 2.64 (m, 1H), 2.43 – 2.30 (m, 1H), 2.30 – 2.19 (m, 1H), 2.13 – 2.02 (m, 1H).

<sup>13</sup>C NMR (101 MHz, CDCl<sub>3</sub>) δ 159.35, 151.85, 129.20, 127.03, 126.57, 114.01, 102.50, 90.27, 69.37, 55.40, 32.00, 24.50.

HRMS (ESI) calculated for C<sub>14</sub>H<sub>14</sub>N<sub>2</sub>O<sub>2</sub> [M+H]<sup>+</sup>: 245.1285; found: 245.1284

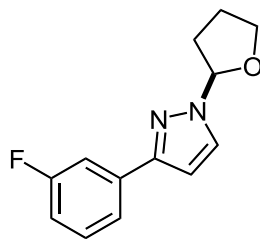

**3-(3-Fluorophenyl)-1-(tetrahydrofuran-2-yl)-1H-pyrazole (3l)**: 57.8 mg, yield: 83%.

<sup>1</sup>H NMR (400 MHz, CDCl<sub>3</sub>) δ 7.64 – 7.54 (m, 3H), 7.37 (q, *J* = 7.8, 7.1 Hz, 1H), 7.01 (t, *J* = 8.4 Hz, 1H), 6.61 – 6.56 (m, 1H), 6.04 (d, *J* = 6.4 Hz, 1H), 4.21 (q, *J* = 7.1 Hz, 1H), 4.05 (q, *J* = 7.1 Hz, 1H), 2.75 – 2.64 (m, 1H), 2.42 – 2.33 (m, 1H), 2.31 – 2.25 (m, 1H), 2.14 – 2.03 (m, 1H).

<sup>13</sup>C NMR (101 MHz, CDCl<sub>3</sub>) δ 163.26 (d, *J* = 244.6 Hz), 150.87, 135.99 (d, *J* = 8.4 Hz), 130.13 (d, *J* = 8.4 Hz), 129.52, 121.39 (d, *J* = 2.9 Hz), 114.46 (d, *J* = 21.3 Hz), 112.58 (d, *J* = 22.5 Hz), 103.18, 90.40, 69.50, 32.05, 24.46.

<sup>19</sup>F NMR (377 MHz, CDCl<sub>3</sub>) δ -113.53.

HRMS (ESI) calculated for C<sub>13</sub>H<sub>13</sub>FN<sub>2</sub>O [M+H]<sup>+</sup>: 233.1085; found: 233.1085.

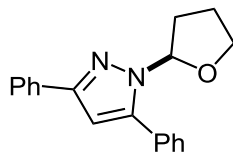

**3,5-Diphenyl-1-(tetrahydrofuran-2-yl)-1H-pyrazole (3m)**<sup>[4]</sup>: 52.2 mg, yield: 60%.

<sup>1</sup>H NMR (400 MHz, CDCl<sub>3</sub>) δ 7.92 (d, *J* = 7.0 Hz, 2H), 7.66 (d, *J* = 6.8 Hz, 2H), 7.53 (t, *J* = 7.2 Hz, 2H), 7.50 – 7.43 (m, 3H), 7.36 (t, *J* = 7.4 Hz, 1H), 6.67 (s, 1H), 6.04 (dd, *J* = 7.2, 3.0 Hz, 1H), 4.36 – 4.29 (m, 1H), 4.08 – 4.00 (m, 1H), 2.92 – 2.83 (m, 1H), 2.72 – 2.60 (m, 1H), 2.32 – 2.23 (m, 1H), 2.15 – 2.05 (m, 1H).

$^{13}\text{C}$  NMR (101 MHz,  $\text{CDCl}_3$ )  $\delta$  150.91, 145.79, 133.68, 130.57, 129.39, 128.79, 128.71, 128.64, 127.81, 125.85, 103.73, 86.69, 69.26, 31.11, 25.68.

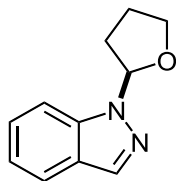

**1-(Tetrahydrofuran-2-yl)-1H-indazole (3n)**: 41.2 mg, yield: 73%.

$^1\text{H}$  NMR (400 MHz,  $\text{CDCl}_3$ )  $\delta$  8.06 (s, 1H), 7.76 (d,  $J$  = 8.1 Hz, 1H), 7.64 (d,  $J$  = 8.5 Hz, 1H), 7.43 (t,  $J$  = 7.7 Hz, 1H), 7.20 (t,  $J$  = 7.5 Hz, 1H), 6.43 (dd,  $J$  = 6.7, 3.2 Hz, 1H), 4.12 – 4.00 (m, 2H), 3.03 – 2.93 (m, 1H), 2.51 – 2.38 (m, 2H), 2.20 – 2.08 (m, 1H).

$^{13}\text{C}$  NMR (101 MHz,  $\text{CDCl}_3$ )  $\delta$  139.94, 134.03, 126.65, 124.75, 121.23, 121.09, 109.74, 86.91, 68.86, 30.33, 25.17.

HRMS (ESI) calculated for  $\text{C}_{11}\text{H}_{12}\text{N}_2\text{O}[\text{M}+\text{Na}]^+$ : 211.0842; found: 211.0843.

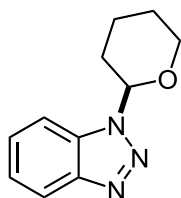

**1-(Tetrahydro-2H-pyran-2-yl)-1H-benzo[d][1,2,3]triazole (3o)**<sup>[1]</sup>: 30.5 mg, yield: 50%.

$^1\text{H}$  NMR (400 MHz,  $\text{CDCl}_3$ )  $\delta$  8.08 (d,  $J$  = 8.4 Hz, 1H), 7.75 (d,  $J$  = 8.3 Hz, 1H), 7.50 (t,  $J$  = 7.6 Hz, 1H), 7.39 (t,  $J$  = 7.6 Hz, 1H), 6.05 (dd,  $J$  = 8.3, 2.9 Hz, 1H), 4.00 – 3.91 (m, 1H), 3.84 – 3.75 (m, 1H), 2.69 – 2.57 (m, 1H), 2.27 – 2.14 (m, 2H), 1.91 – 1.69 (m, 3H).

$^{13}\text{C}$  NMR (101 MHz,  $\text{CDCl}_3$ )  $\delta$  146.41, 132.50, 127.54, 124.23, 119.96, 111.18, 85.74, 66.97, 29.37, 24.99, 21.72.

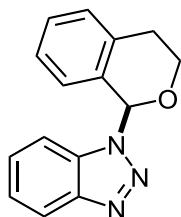

**1-(Isochroman-1-yl)-1H-benzo[d][1,2,3]triazole (3p)**<sup>[1]</sup>: 67.8 mg, yield: 90%.

$^1\text{H}$  NMR (400 MHz,  $\text{CDCl}_3$ )  $\delta$  8.09 (dd,  $J$  = 6.3, 3.1 Hz, 1H), 7.44 (s, 1H), 7.42 – 7.33 (m, 4H), 7.21 (t,  $J$  = 7.3 Hz, 1H), 7.03 (dq,  $J$  = 6.9, 3.3 Hz, 1H), 6.96 (d,  $J$  = 7.8 Hz, 1H), 4.15 – 4.08 (m, 2H), 3.16 (dt,  $J$  = 14.3, 6.9 Hz, 1H), 3.07 – 3.01 (m, 1H).

$^{13}\text{C}$  NMR (101 MHz,  $\text{CDCl}_3$ )  $\delta$  146.48, 134.80, 132.72, 130.26, 129.17, 127.74, 127.11, 126.95, 124.18, 120.14, 110.84, 83.51, 62.11, 27.89.

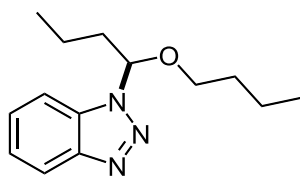

**1-(1-Butoxybutyl)-1H-benzo[d][1,2,3]triazole (3q)**<sup>[5]</sup>: 22.2 mg, yield: 30%.

$^1\text{H}$  NMR (400 MHz,  $\text{CDCl}_3$ )  $\delta$  8.10 (d,  $J = 8.3$  Hz, 1H), 7.81 (d,  $J = 8.3$  Hz, 1H), 7.50 (t,  $J = 7.6$  Hz, 1H), 7.41 (t,  $J = 8.1$  Hz, 1H), 6.08 (t,  $J = 6.8$  Hz, 1H), 3.52 – 3.44 (m, 1H), 3.27 – 3.18 (m, 1H), 2.34 – 2.22 (m, 1H), 2.17 – 2.06 (m, 1H), 1.56 – 1.43 (m, 3H), 1.36 – 1.27 (m, 3H), 0.96 (t,  $J = 7.4$  Hz, 3H), 0.84 (t,  $J = 7.4$  Hz, 3H).

$^{13}\text{C}$  NMR (101 MHz,  $\text{CDCl}_3$ )  $\delta$  146.93, 131.36, 127.45, 124.29, 120.17, 111.47, 91.05, 69.03, 36.85, 31.38, 19.28, 18.38, 13.83, 13.63.

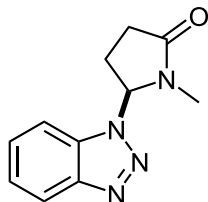

**5-(1H-benzo[d][1,2,3]triazol-1-yl)-1-methylpyrrolidin-2-one (3r)**<sup>[1]</sup>: 55.1 mg, yield: 85%.

$^1\text{H}$  NMR (400 MHz,  $\text{CDCl}_3$ )  $\delta$  8.14 (d,  $J = 8.2$  Hz, 1H), 7.58 – 7.52 (m, 1H), 7.48 – 7.43 (m, 2H), 6.52 (dd,  $J = 8.5, 2.9$  Hz, 1H), 3.01 – 2.81 (m, 2H), 2.70 (s, 4H), 2.53 – 2.44 (m, 1H).

$^{13}\text{C}$  NMR (101 MHz,  $\text{CDCl}_3$ )  $\delta$  174.51, 146.69, 131.34, 128.47, 124.71, 120.78, 109.05, 74.69, 29.37, 27.73, 25.16.

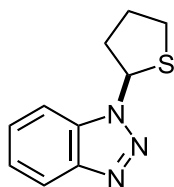

**1-(Tetrahydrothiophen-2-yl)-1H-benzo[d][1,2,3]triazole (3s)**<sup>[3]</sup>: 30.8 mg, yield: 50%.

$^1\text{H}$  NMR (400 MHz,  $\text{CDCl}_3$ )  $\delta$  8.07 (d,  $J = 8.4$  Hz, 1H), 7.66 (d,  $J = 8.4$  Hz, 1H), 7.49 (t,  $J = 7.2$  Hz, 1H), 7.38 (t,  $J = 7.2$  Hz, 1H), 6.48 (dd,  $J = 6.4, 3.9$  Hz, 1H), 3.37 – 3.29 (m, 1H), 3.16 – 3.10 (m, 1H), 2.98 – 2.93 (m, 1H), 2.64 – 2.47 (m, 2H), 2.39 – 2.32 (m, 1H).

$^{13}\text{C}$  NMR (101 MHz,  $\text{CDCl}_3$ )  $\delta$  146.52, 132.18, 127.23, 124.13, 120.18, 110.38, 65.97, 37.28, 33.97, 29.96.

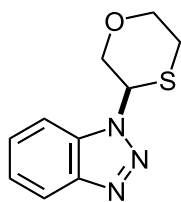

**1-(1,4-Oxathian-3-yl)-1H-benzo[d][1,2,3]triazole (3t)**: 41.8 mg, yield: 63%.

$^1\text{H}$  NMR (400 MHz,  $\text{CDCl}_3$ )  $\delta$  8.12 (d,  $J = 8.4$  Hz, 1H), 7.80 (d,  $J = 8.4$  Hz, 1H), 7.54 (t,  $J = 8.1$  Hz, 1H), 7.42 (t,  $J = 7.7$  Hz, 1H), 5.79 (dd,  $J = 5.8, 3.1$  Hz, 1H), 4.67 (dd,  $J = 12.1, 5.8$  Hz, 1H), 4.46 (dd,  $J = 12.1, 3.1$  Hz, 1H), 4.19 – 4.13 (m, 2H), 3.11 (dt,  $J = 13.8, 5.3$  Hz, 1H), 2.86 (dt,  $J = 13.8, 4.8$  Hz, 1H).

$^{13}\text{C}$  NMR (101 MHz,  $\text{CDCl}_3$ )  $\delta$  146.13, 132.46, 127.75, 124.41, 120.38, 110.51, 70.85, 68.24, 54.28, 26.77.

HRMS (ESI) calculated for  $\text{C}_{10}\text{H}_{11}\text{N}_3\text{OS}$   $[\text{M}+\text{Na}]^+$ : 244.0515; found: 244.0518.

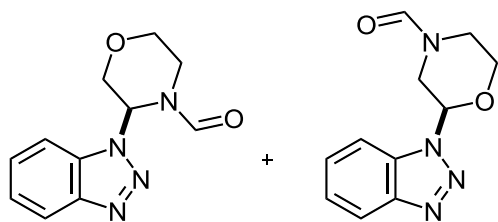

**3-(1H-benzo[d][1,2,3]triazol-1-yl)morpholine-4-carbaldehyde and 2-(1H-benzo[d][1,2,3]triazol-1-yl)morpholine-4-carbaldehyde (3u/3u<sup>I</sup> = 2.3/1):** 63.4 mg, yield: 91%.

<sup>1</sup>H NMR (400 MHz, CDCl<sub>3</sub>) δ 8.63 (s, 0.43H), 8.18 (s, 1.00H), 8.12 – 8.06 (m, 1.44H), 7.90 (d, *J* = 8.5 Hz, 0.45H), 7.82 (d, *J* = 8.4 Hz, 1.02H), 7.56 – 7.48 (m, 1.47H), 7.40 (q, *J* = 8.1 Hz, 1.48H), 6.85 (d, *J* = 3.6 Hz, 1.00H), 6.41 (d, *J* = 3.4 Hz, 0.45H), 4.85 – 4.76 (m, 1.50H), 4.26 – 4.15 (m, 2.42H), 4.10 (dd, *J* = 12.6, 3.7 Hz, 1.07H), 3.82 – 3.63 (m, 2.59H), 3.48 (d, *J* = 13.3 Hz, 1.06H), 3.16 – 3.05 (m, 0.47H).

<sup>13</sup>C NMR (101 MHz, CDCl<sub>3</sub>) δ 175.55, 174.43, 146.61, 144.49, 131.26, 128.39, 127.06, 124.63, 120.70, 118.43, 108.97, 80.59, 74.62, 29.29, 28.84, 27.65, 25.81, 25.08, 23.85.

HRMS (ESI) calculated for C<sub>11</sub>H<sub>12</sub>N<sub>4</sub>O<sub>2</sub> [M+Na]<sup>+</sup>: 255.0852; found: 255.0858.

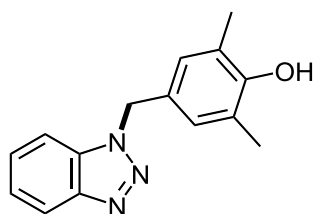

**4-((1H-benzo[d][1,2,3]triazol-1-yl)methyl)-2,6-dimethylphenol (3v):** 51.7 mg, yield: 68%.

<sup>1</sup>H NMR (400 MHz, CDCl<sub>3</sub>) δ 8.07 (d, *J* = 8.3 Hz, 1H), 7.43 (d, *J* = 3.6 Hz, 2H), 7.38 – 7.34 (m, 1H), 6.97 (s, 2H), 5.73 (s, 2H), 5.34 (s, 1H), 2.23 (s, 6H). <sup>13</sup>C NMR (101 MHz, CDCl<sub>3</sub>) δ 152.57, 146.23, 132.73, 128.14, 127.29, 126.03, 123.93, 123.85, 119.89, 110.00, 52.07, 16.06.

HRMS (ESI) calculated for C<sub>15</sub>H<sub>15</sub>N<sub>3</sub>O [M+H]<sup>+</sup>: 254.1288; found: 254.1296.

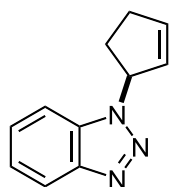

**1-(Cyclopent-2-en-1-yl)-1H-benzo[d][1,2,3]triazole (3w)<sup>[6]</sup>:** 23.3mg, yield: 42%.

<sup>1</sup>H NMR (400 MHz, CDCl<sub>3</sub>) δ 8.09 (d, *J* = 7.7 Hz, 1H), 7.58 – 7.52 (m, 1H), 7.49 – 7.42 (m, 1H), 7.40 – 7.36 (m, *J* = 8.0, 7.0, 1.0 Hz, 1H), 6.34 – 6.31 (m, 1H), 6.20 – 6.18 (m, 1H), 6.01 – 5.99 (m, 1H), 2.90 – 2.78 (m, 1H), 2.78 – 2.61 (m, 2H), 2.29 – 2.20 (m, 1H). <sup>13</sup>C NMR (101 MHz, CDCl<sub>3</sub>) δ 146.70, 137.07, 131.96, 128.45, 126.87, 123.77, 120.11, 110.26, 65.84, 32.05, 30.16.

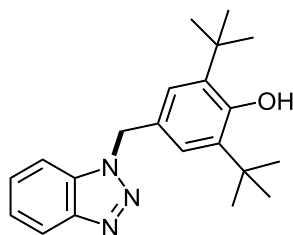

**4-((1H-benzo[d][1,2,3]triazol-1-yl)methyl)-2,6-di-tert-butylphenol (5a):** 76.8 mg, yield: 76%.

$^1\text{H}$  NMR (400 MHz,  $\text{CDCl}_3$ )  $\delta$  8.10 – 8.05 (m, 1H), 7.46 (q,  $J = 8.7$  Hz, 2H), 7.39 – 7.33 (m, 1H), 7.20 (s, 2H), 5.77 (s, 2H), 5.34 (d,  $J = 2.9$  Hz, 1H), 1.41 (s, 18H).  $^{13}\text{C}$  NMR (101 MHz,  $\text{CDCl}_3$ )  $\delta$  153.95, 146.22, 136.50, 132.82, 127.20, 125.42, 124.86, 123.81, 119.95, 109.93, 52.71, 34.33, 30.17.  
HRMS (ESI) calculated for  $\text{C}_{21}\text{H}_{27}\text{N}_3\text{O}[\text{M}+\text{H}]^+$ : 338.2227; found: 338.2230.

## 6. Copies of product NMR spectra

**1-(Tetrahydrofuran-2-yl)-1H-benzo[d][1,2,3]triazole (3a)**

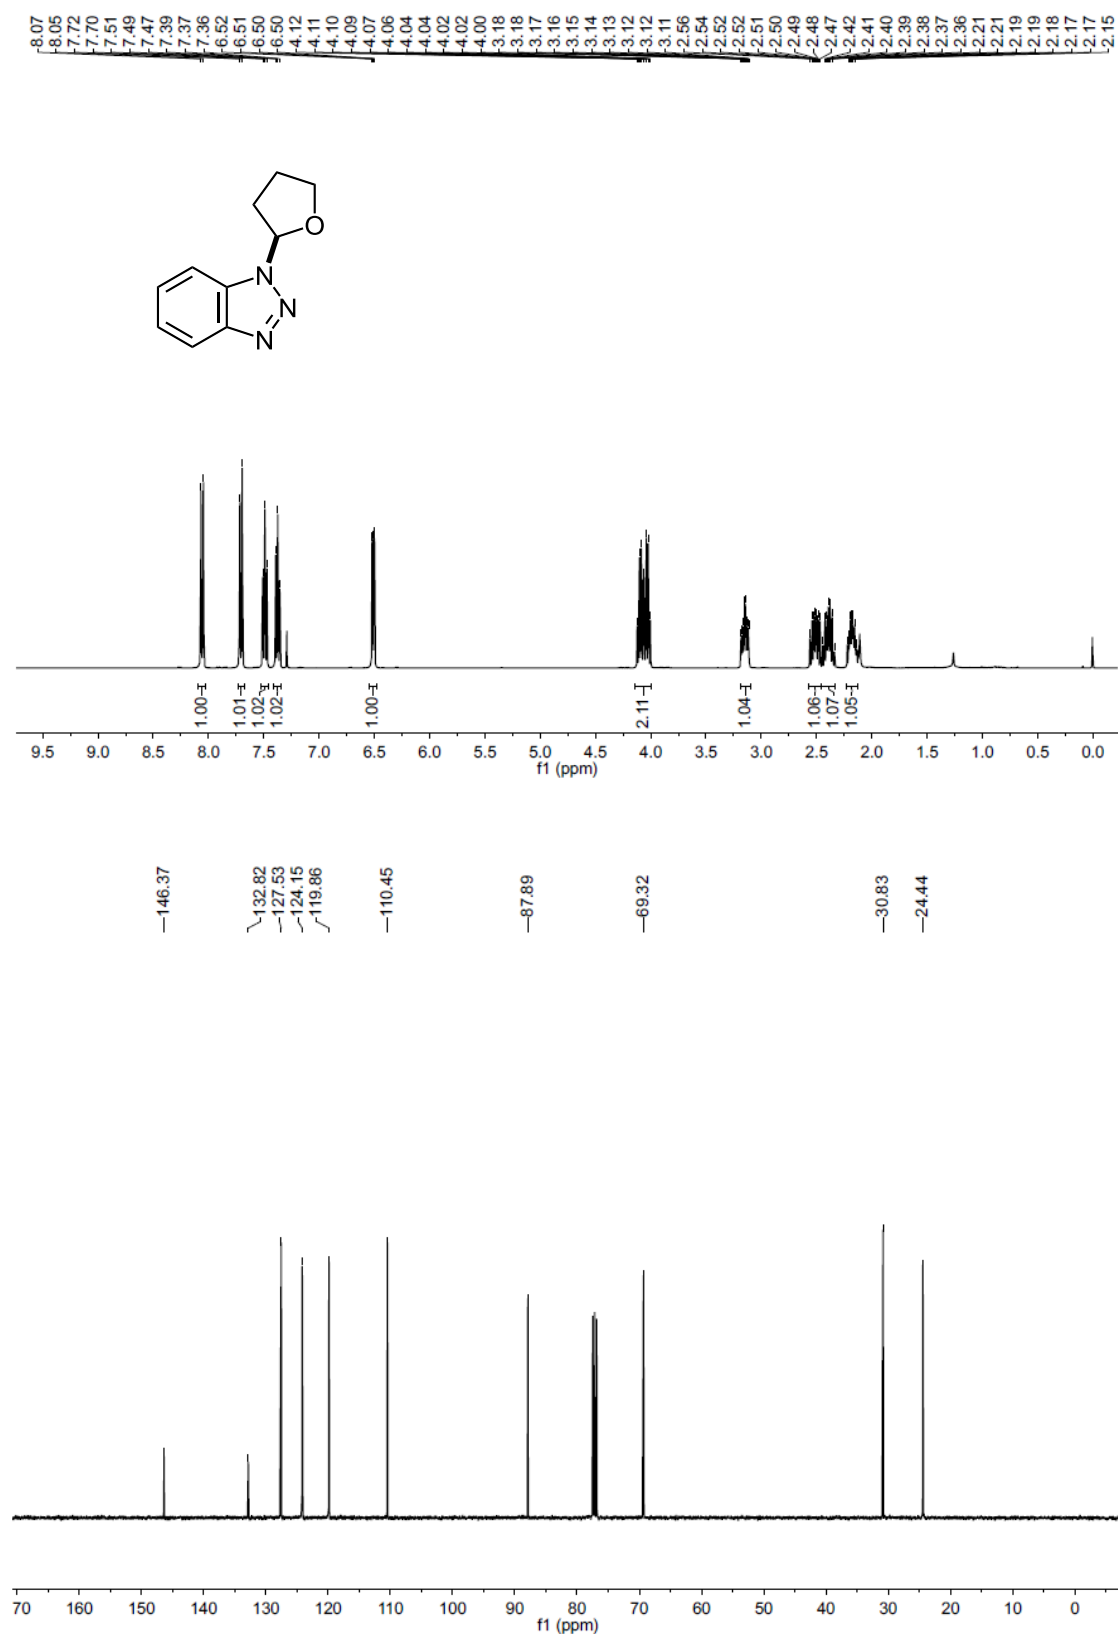

**5-Methyl-1-(tetrahydrofuran-2-yl)-1H-benzo[d][1,2,3]triazole and 6-Methyl-1-(tetrahydrofuran-2-yl)-1H-benzo[d][1,2,3]triazole (3b, N1/N3 = 1/1.6)**

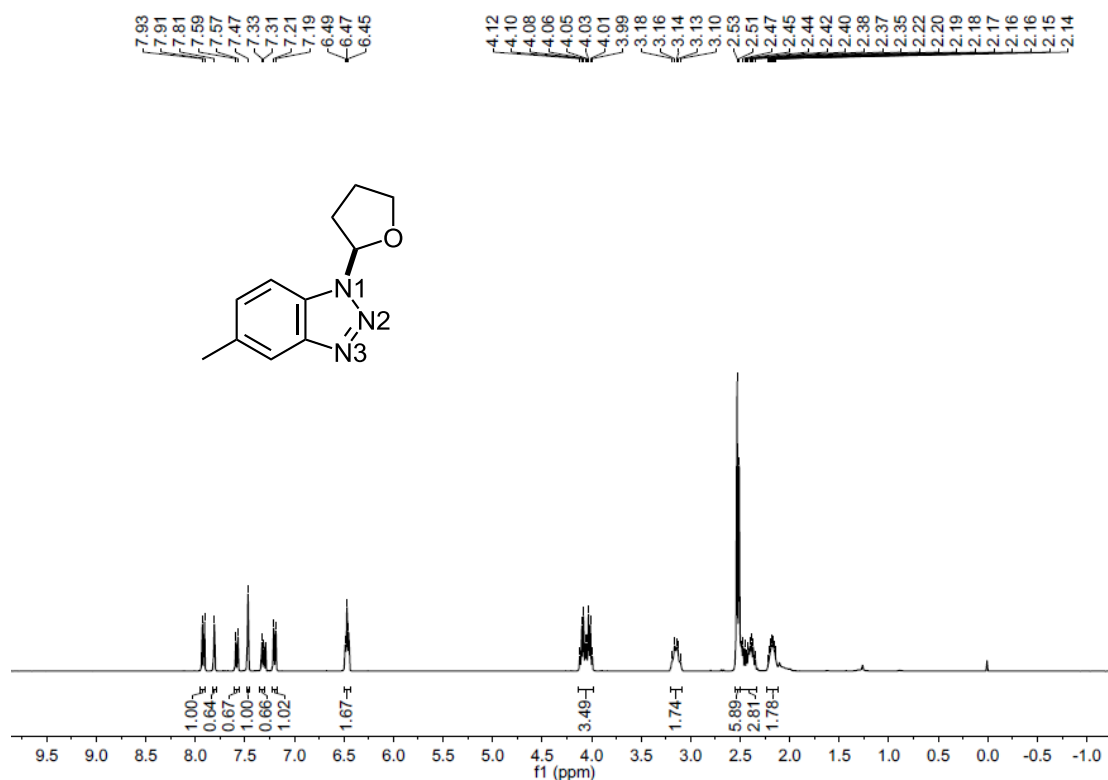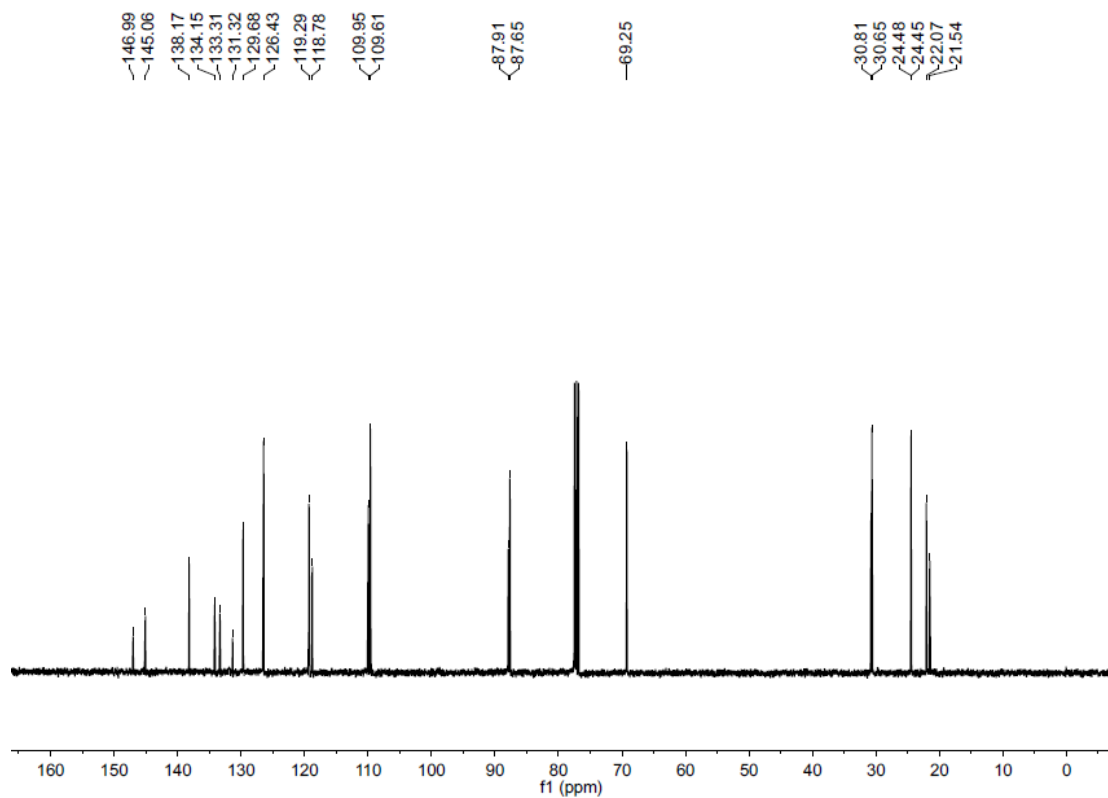

**5,6-Dimethyl-1-(tetrahydrofuran-2-yl)-1H-benzo[d][1,2,3]triazole (3c)**

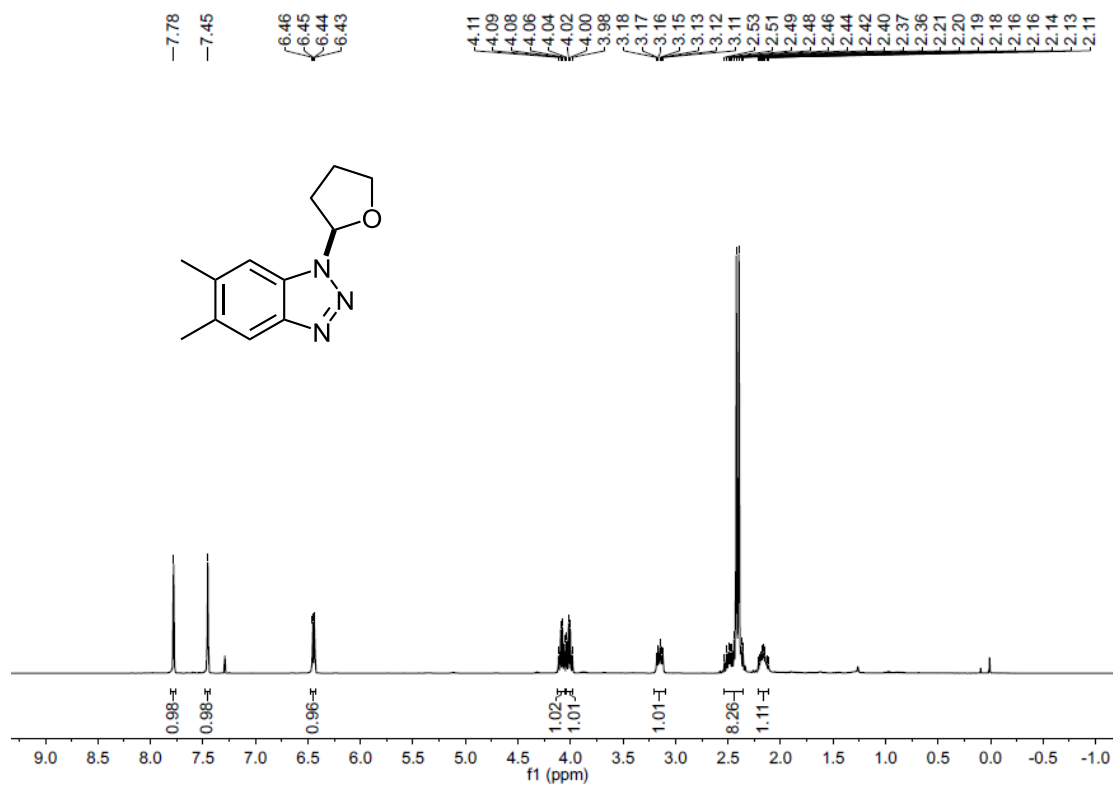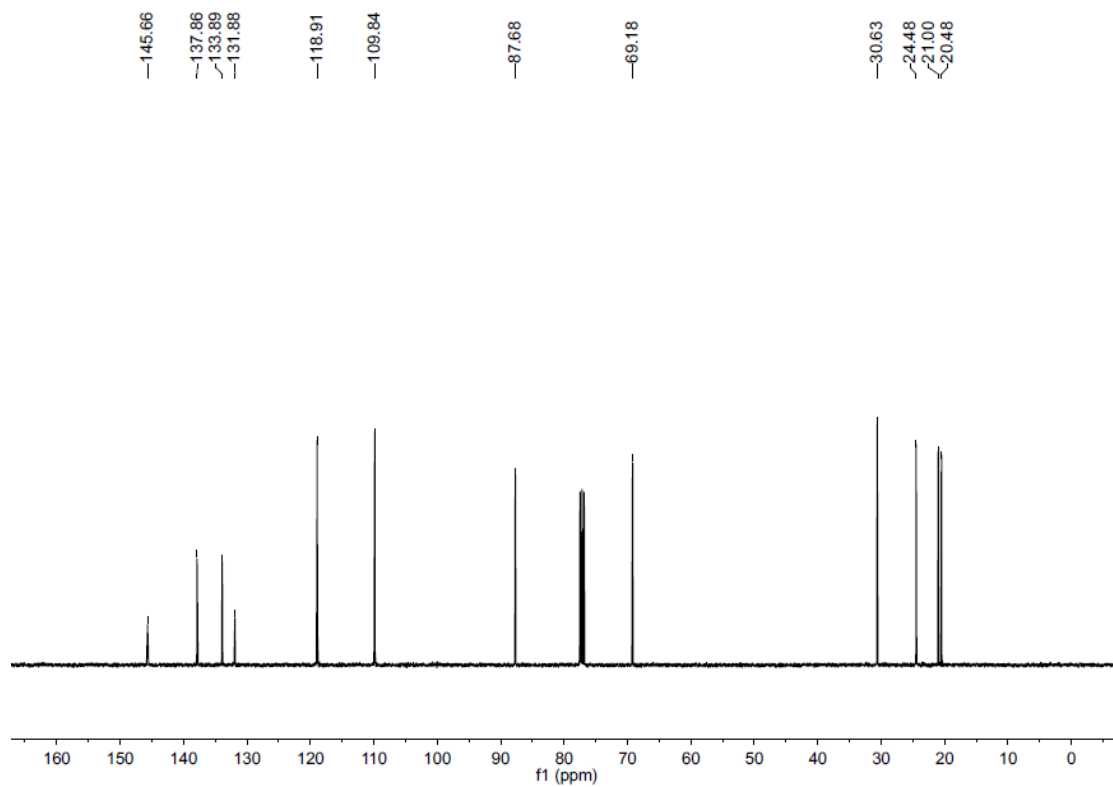



**Methyl-1-(tetrahydrofuran-2-yl)-1H-benzo[d][1,2,3]triazole-5-carboxylate and Methyl 1-(tetrahydrofuran-2-yl)-1H-benzo[d][1,2,3]triazole-6-carboxylate (3d, N1/N3 = 1/3.7)**

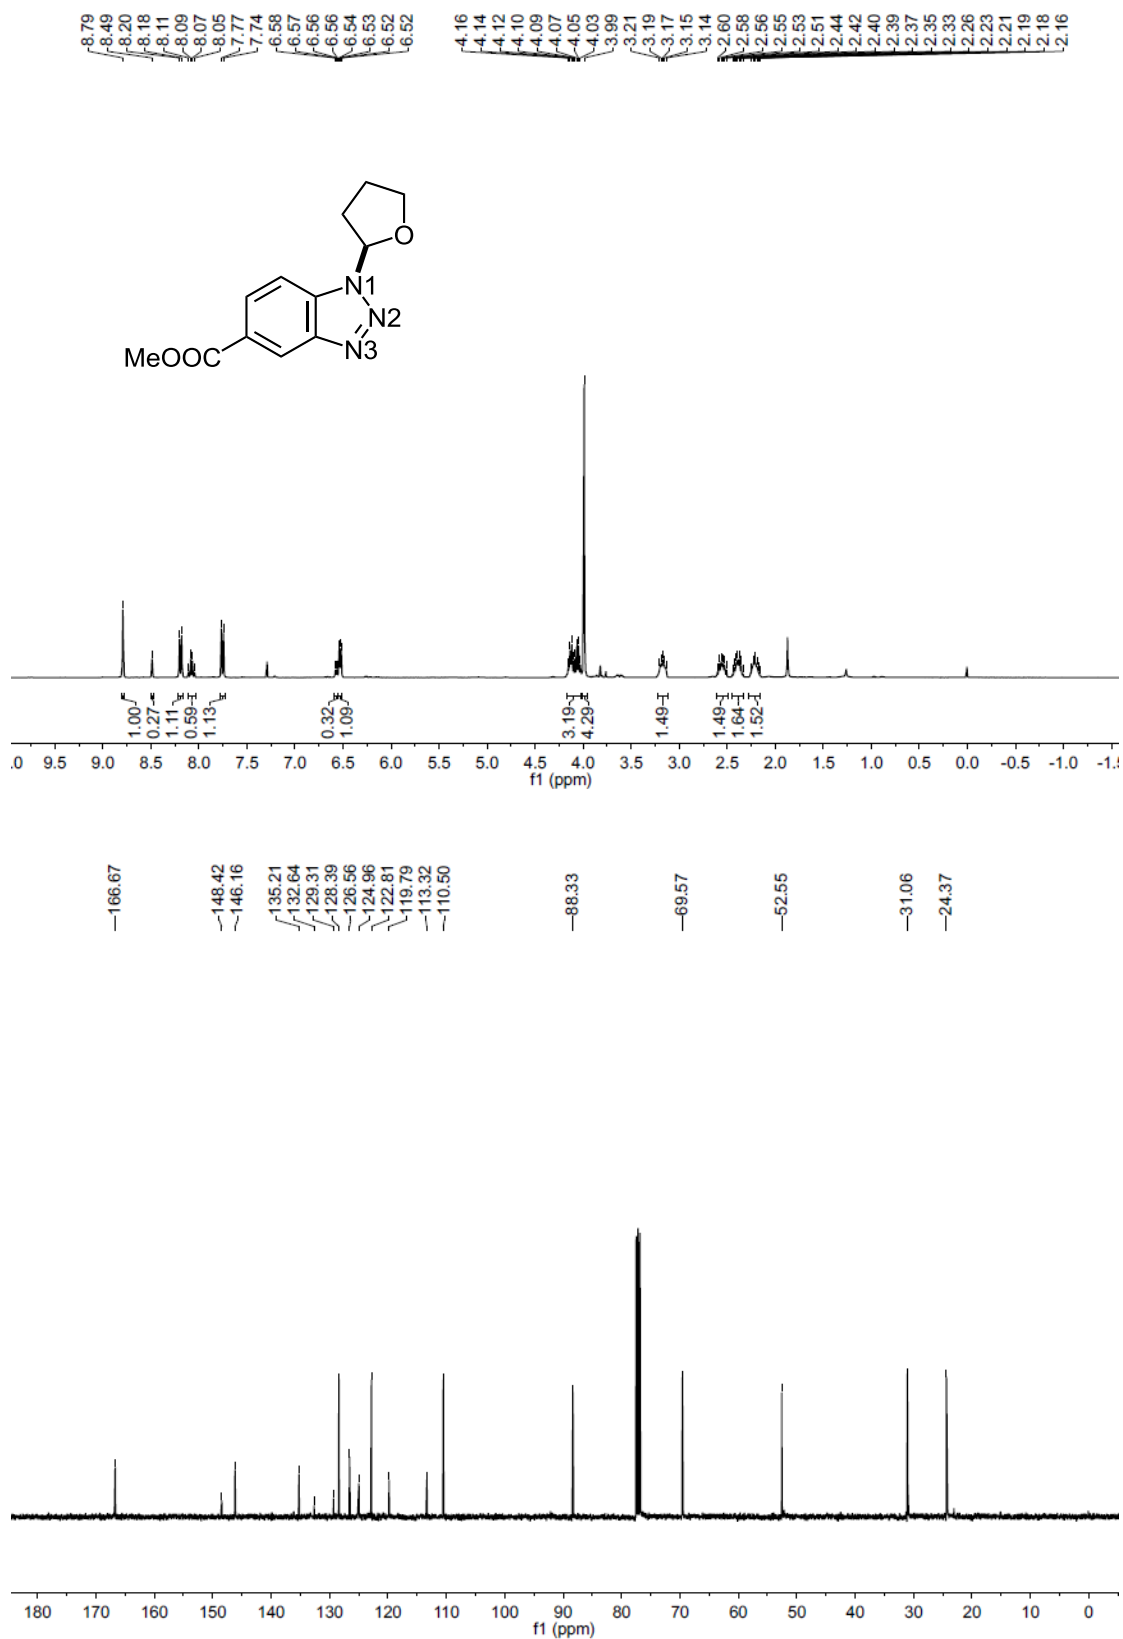

**5,6-Dichloro-1-(tetrahydrofuran-2-yl)-1H-benzo[d][1,2,3]triazole (3e)**

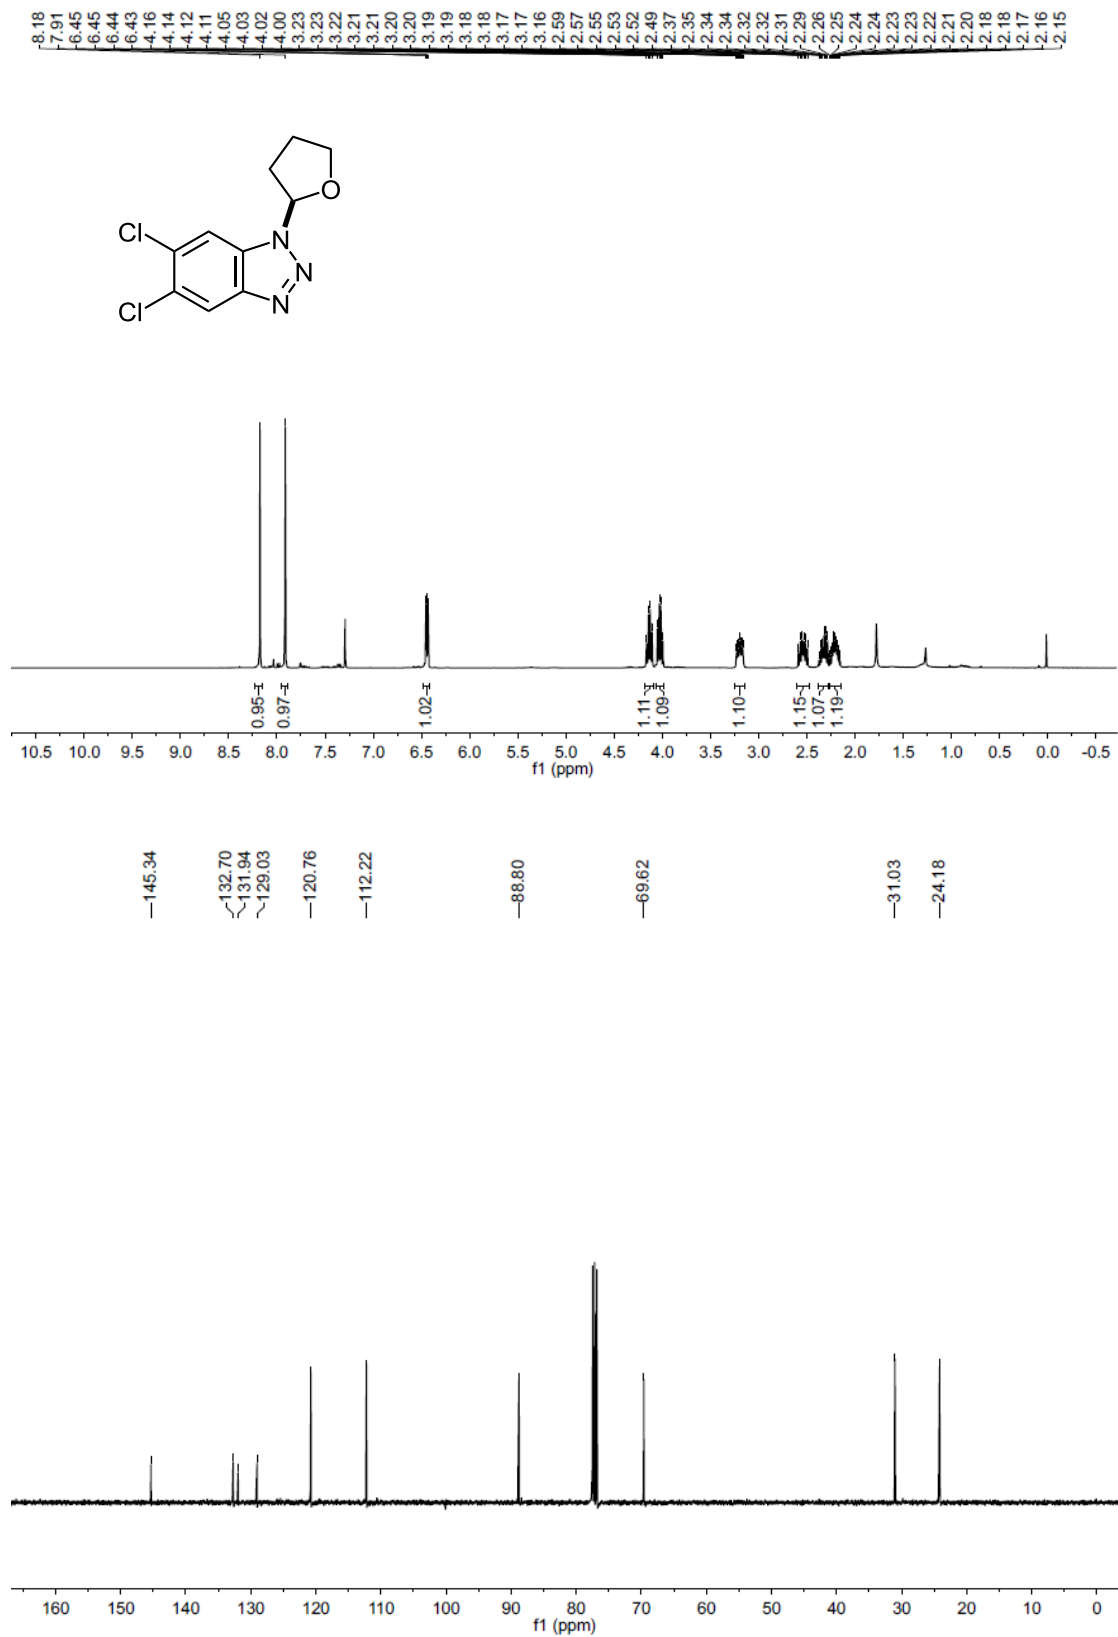

### 5-Phenyl-2-(tetrahydrofuran-2-yl)-2H-tetrazole (3f)

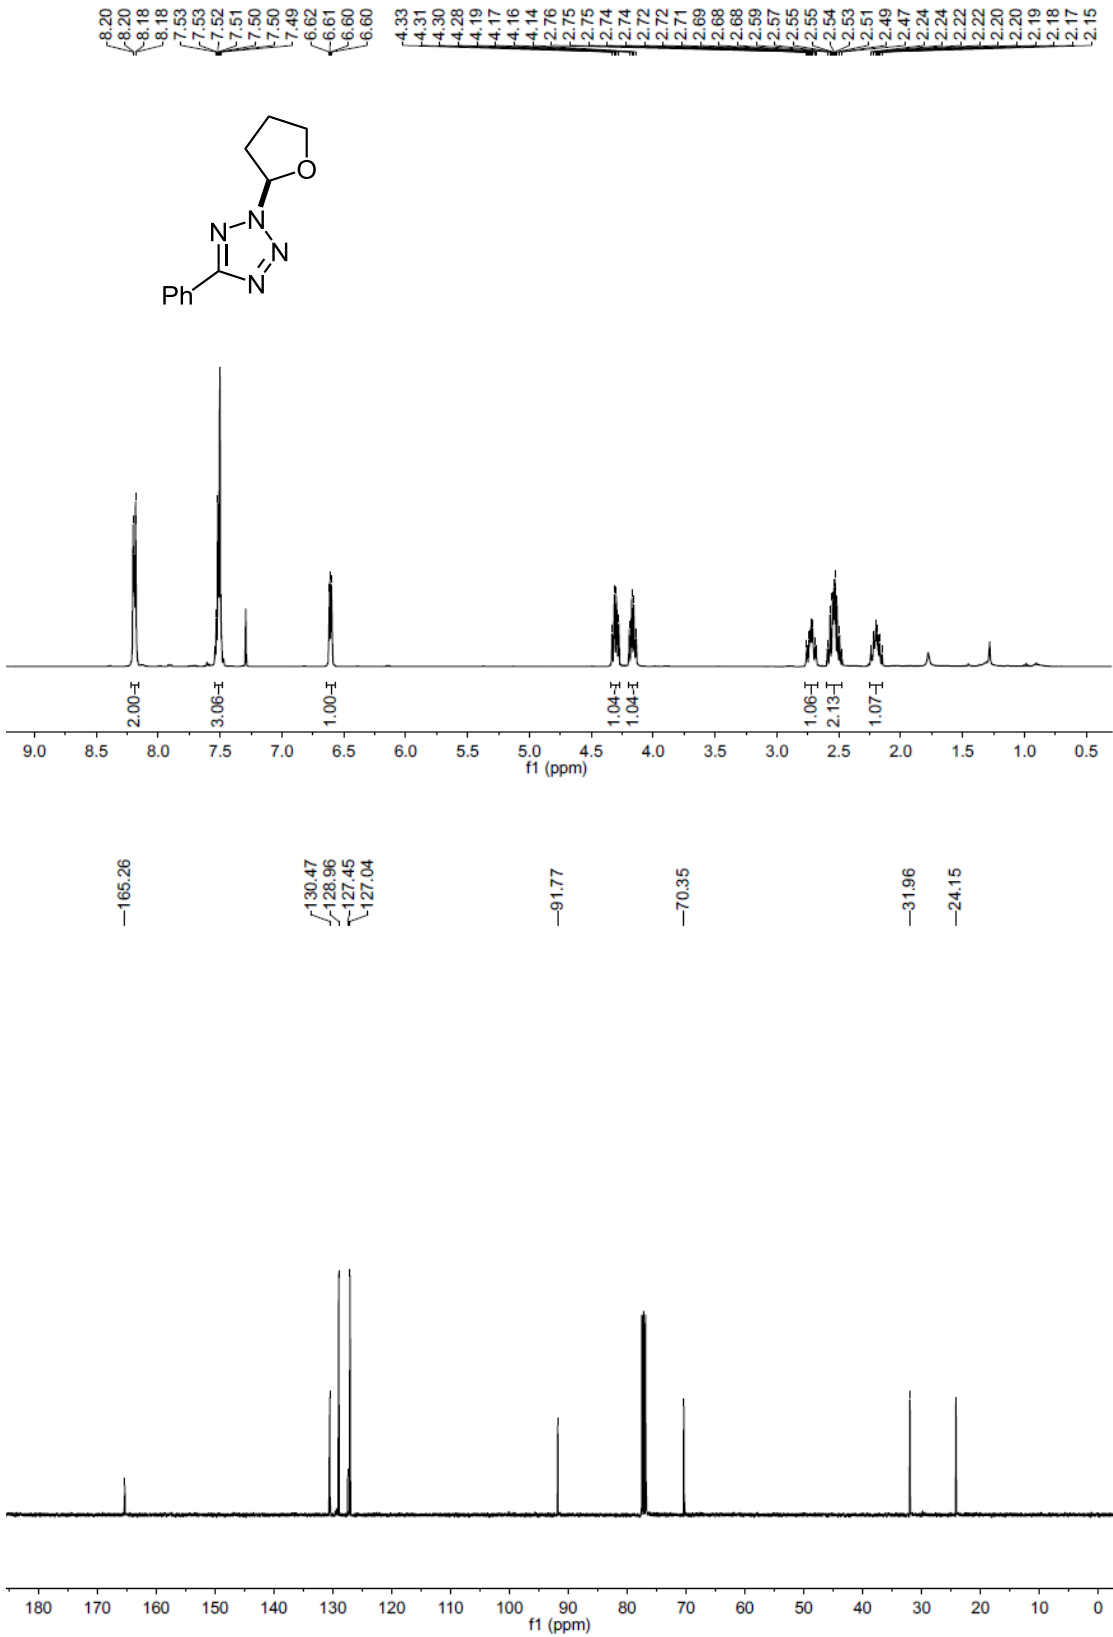

**4-Phenyl-1-(tetrahydrofuran-2-yl)-1H-1,2,3-triazole (3g)**

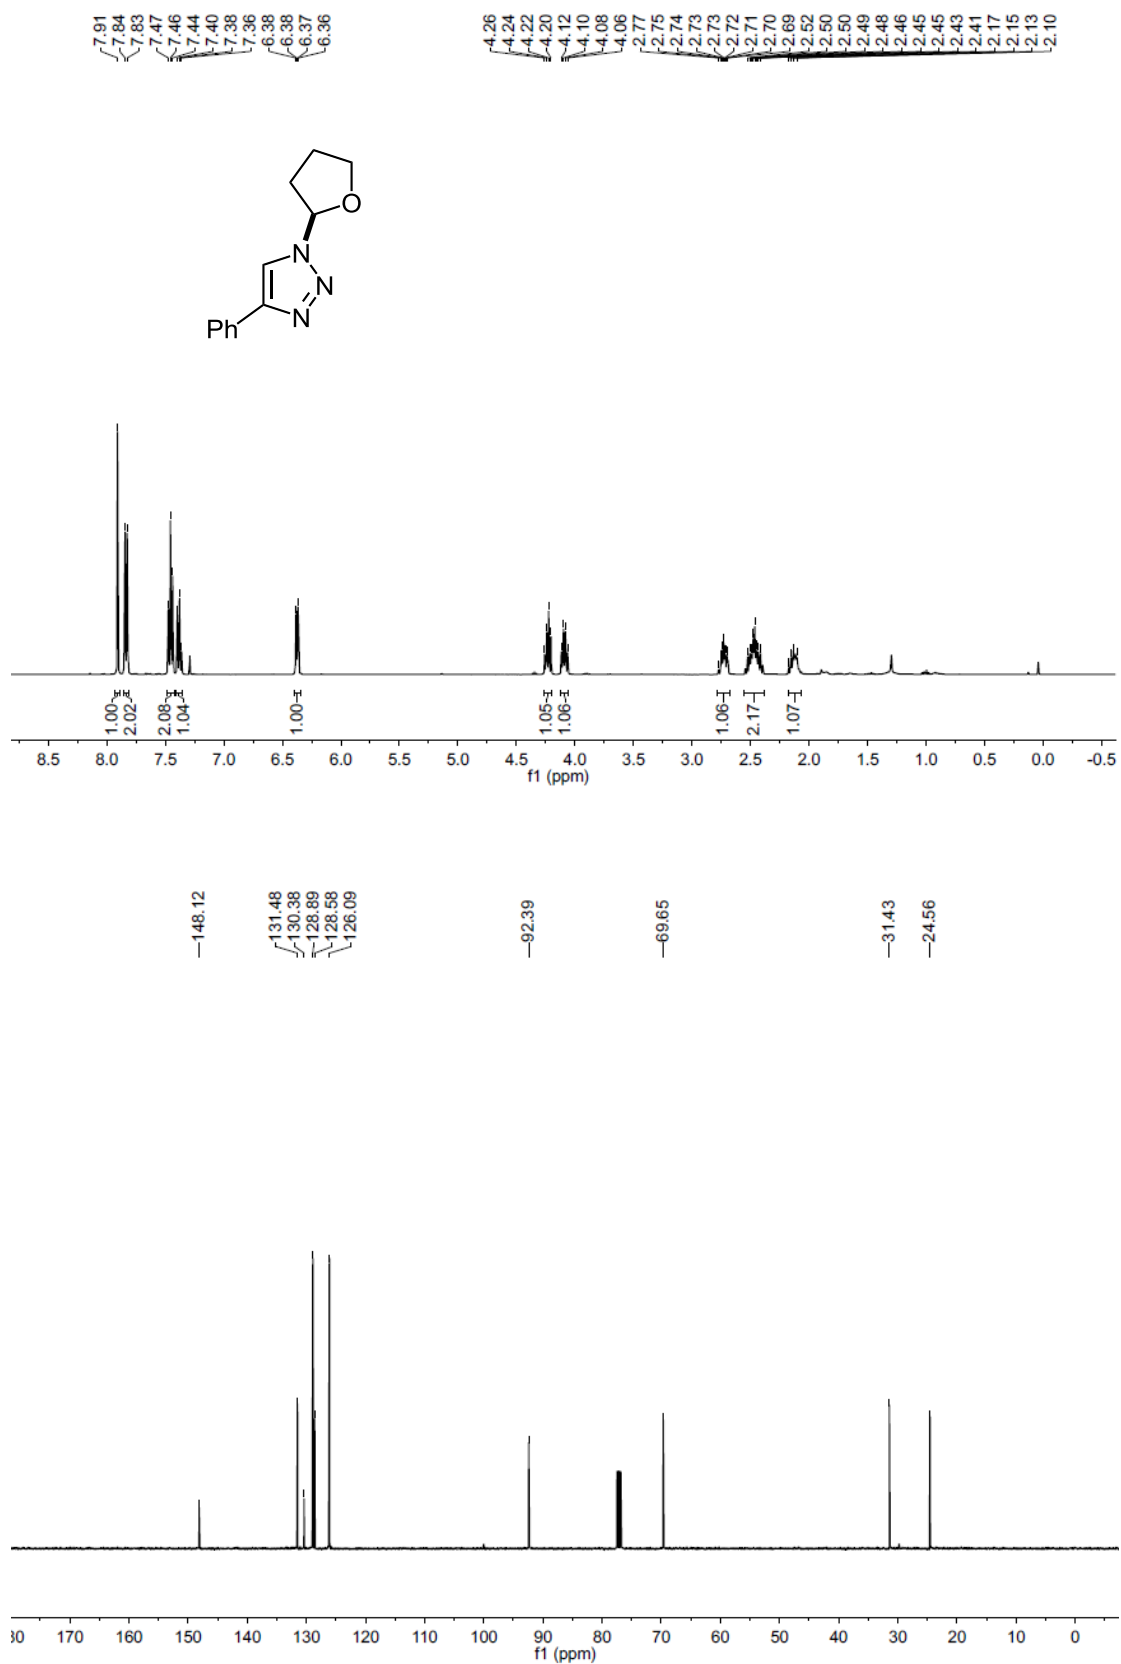

**4-(4-Methoxyphenyl)-1-(tetrahydrofuran-2-yl)-1H-1,2,3-triazole (3h)**

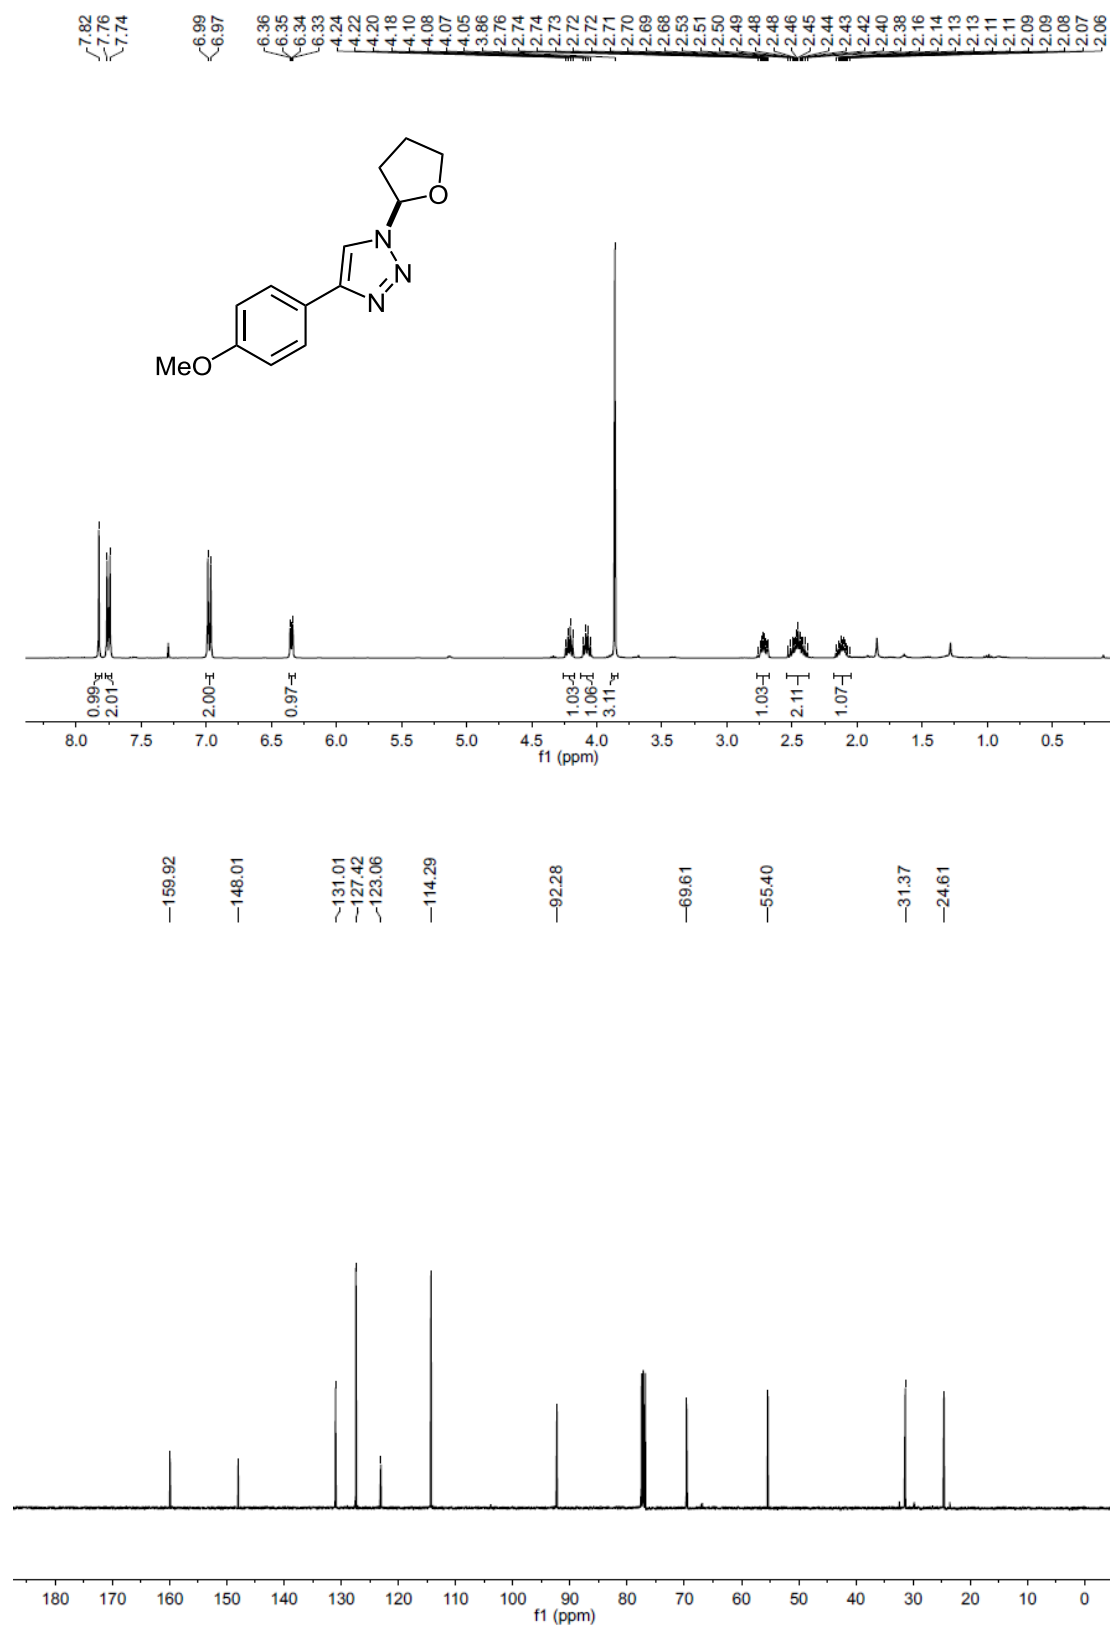

**4-(4-Chlorophenyl)-1-(tetrahydrofuran-2-yl)-1H-1,2,3-triazole (3i)**

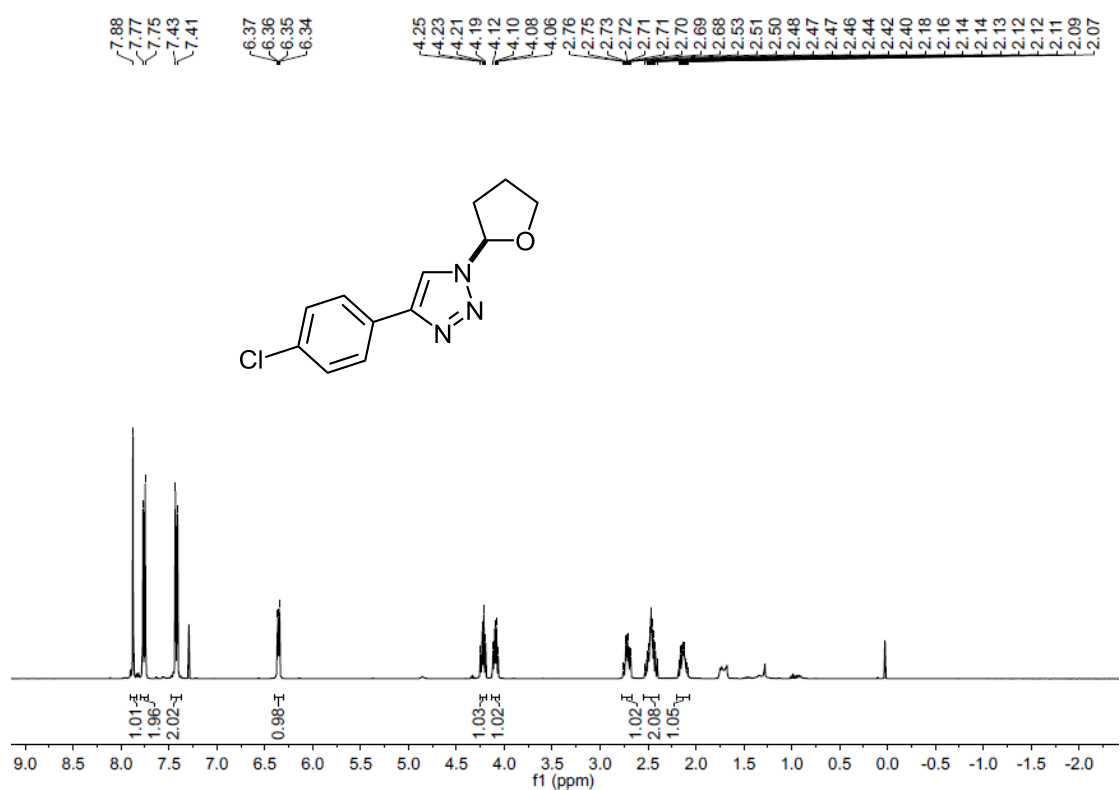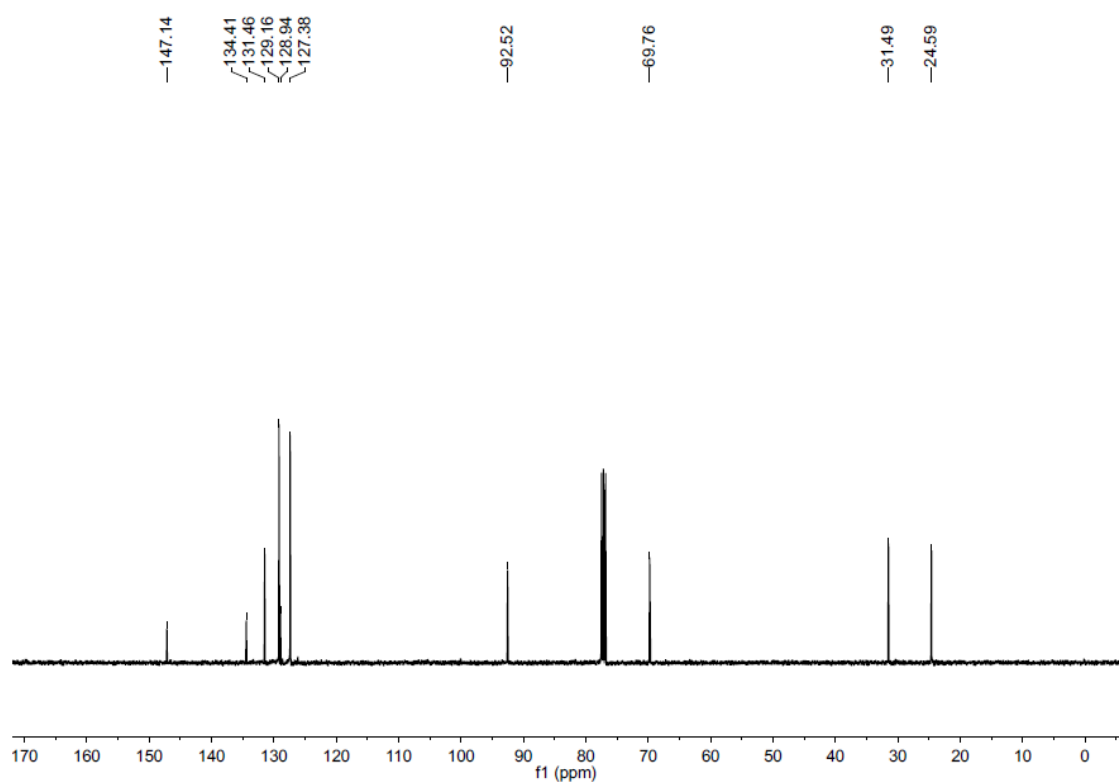

**3-Phenyl-1-(tetrahydrofuran-2-yl)-1H-pyrazole (3j)**

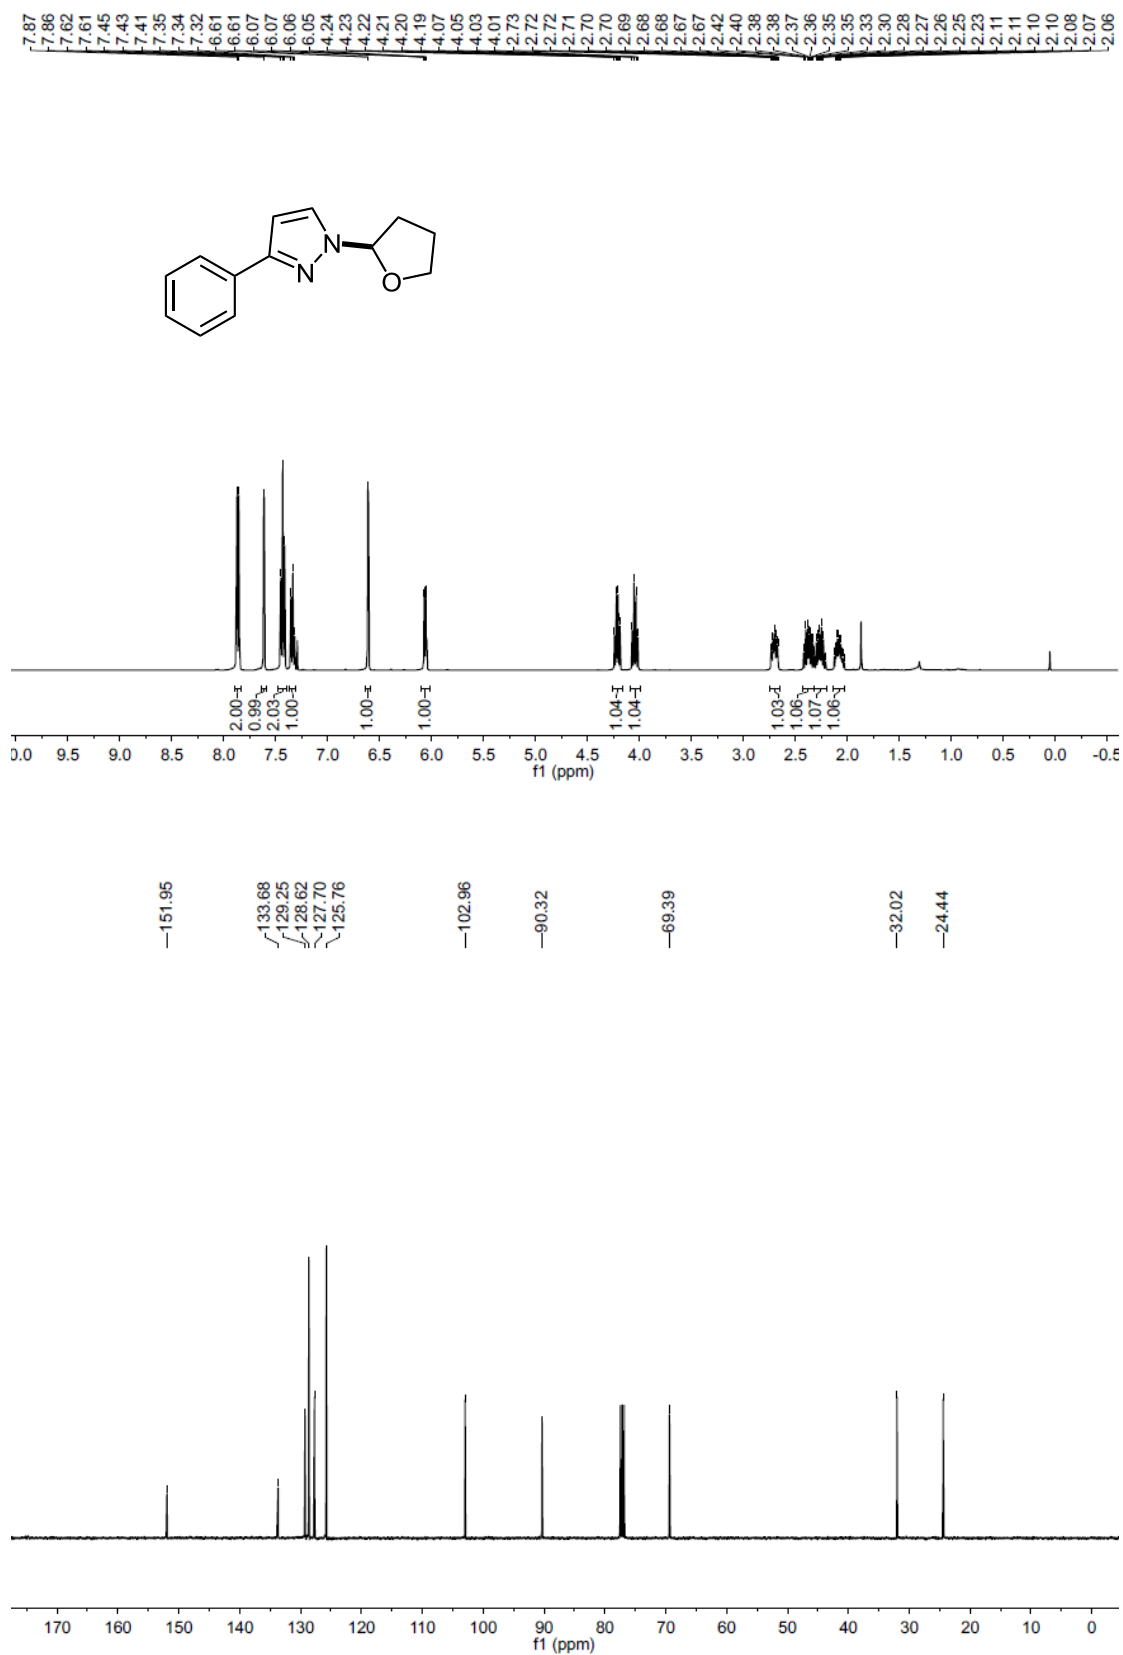

**3-(4-Methoxyphenyl)-1-(tetrahydrofuran-2-yl)-1H-pyrazole (3k)**

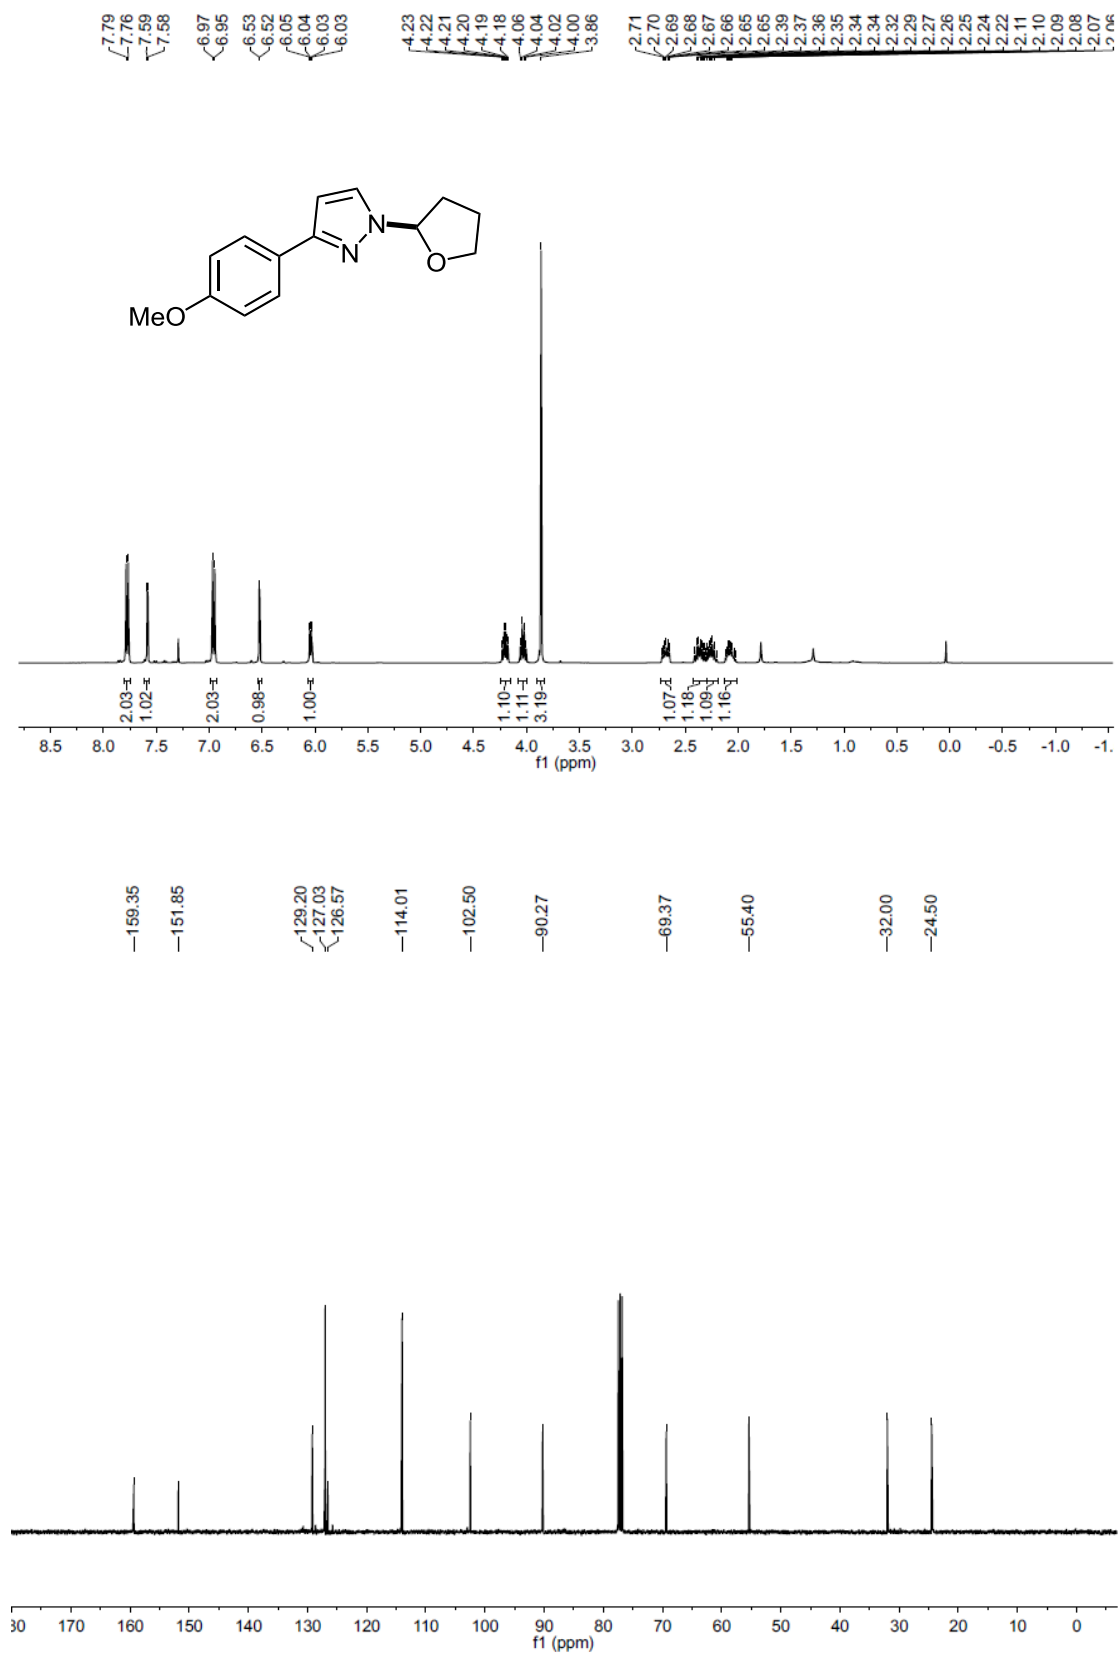



**3-(3-Fluorophenyl)-1-(tetrahydrofuran-2-yl)-1H-pyrazole (3l)**

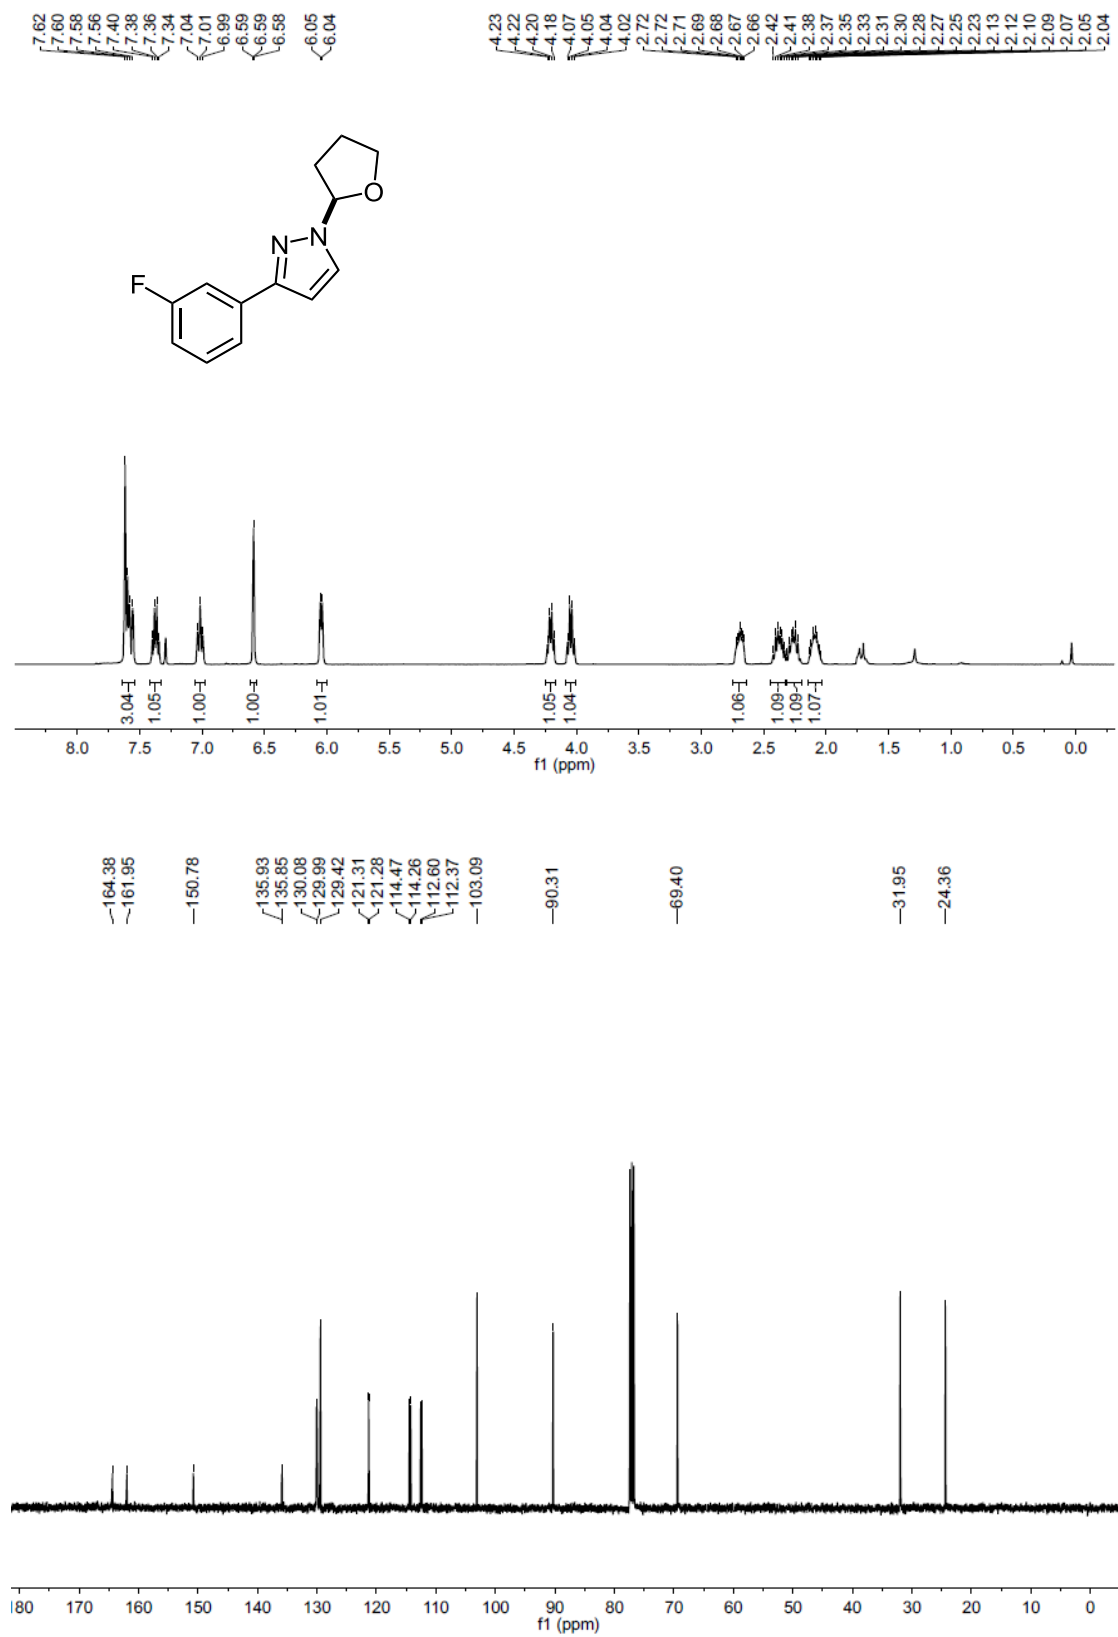

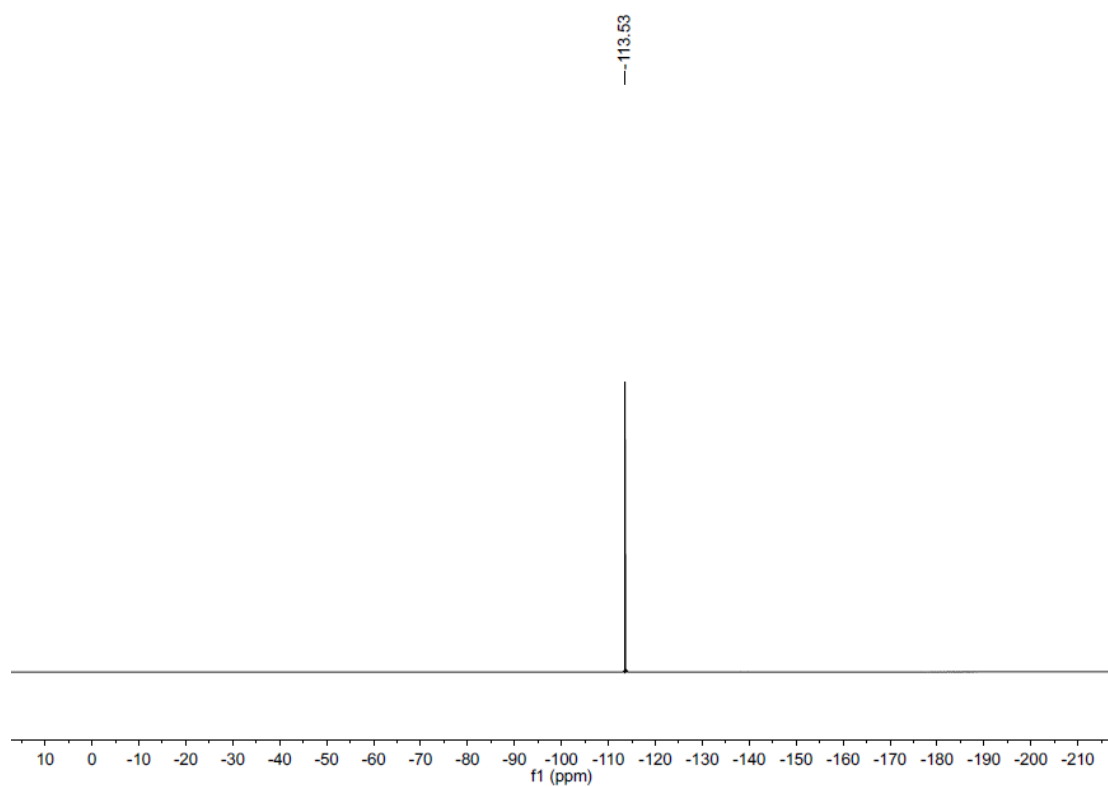

3,5-diphenyl-1-(tetrahydrofuran-2-yl)-1H-pyrazole (3m)

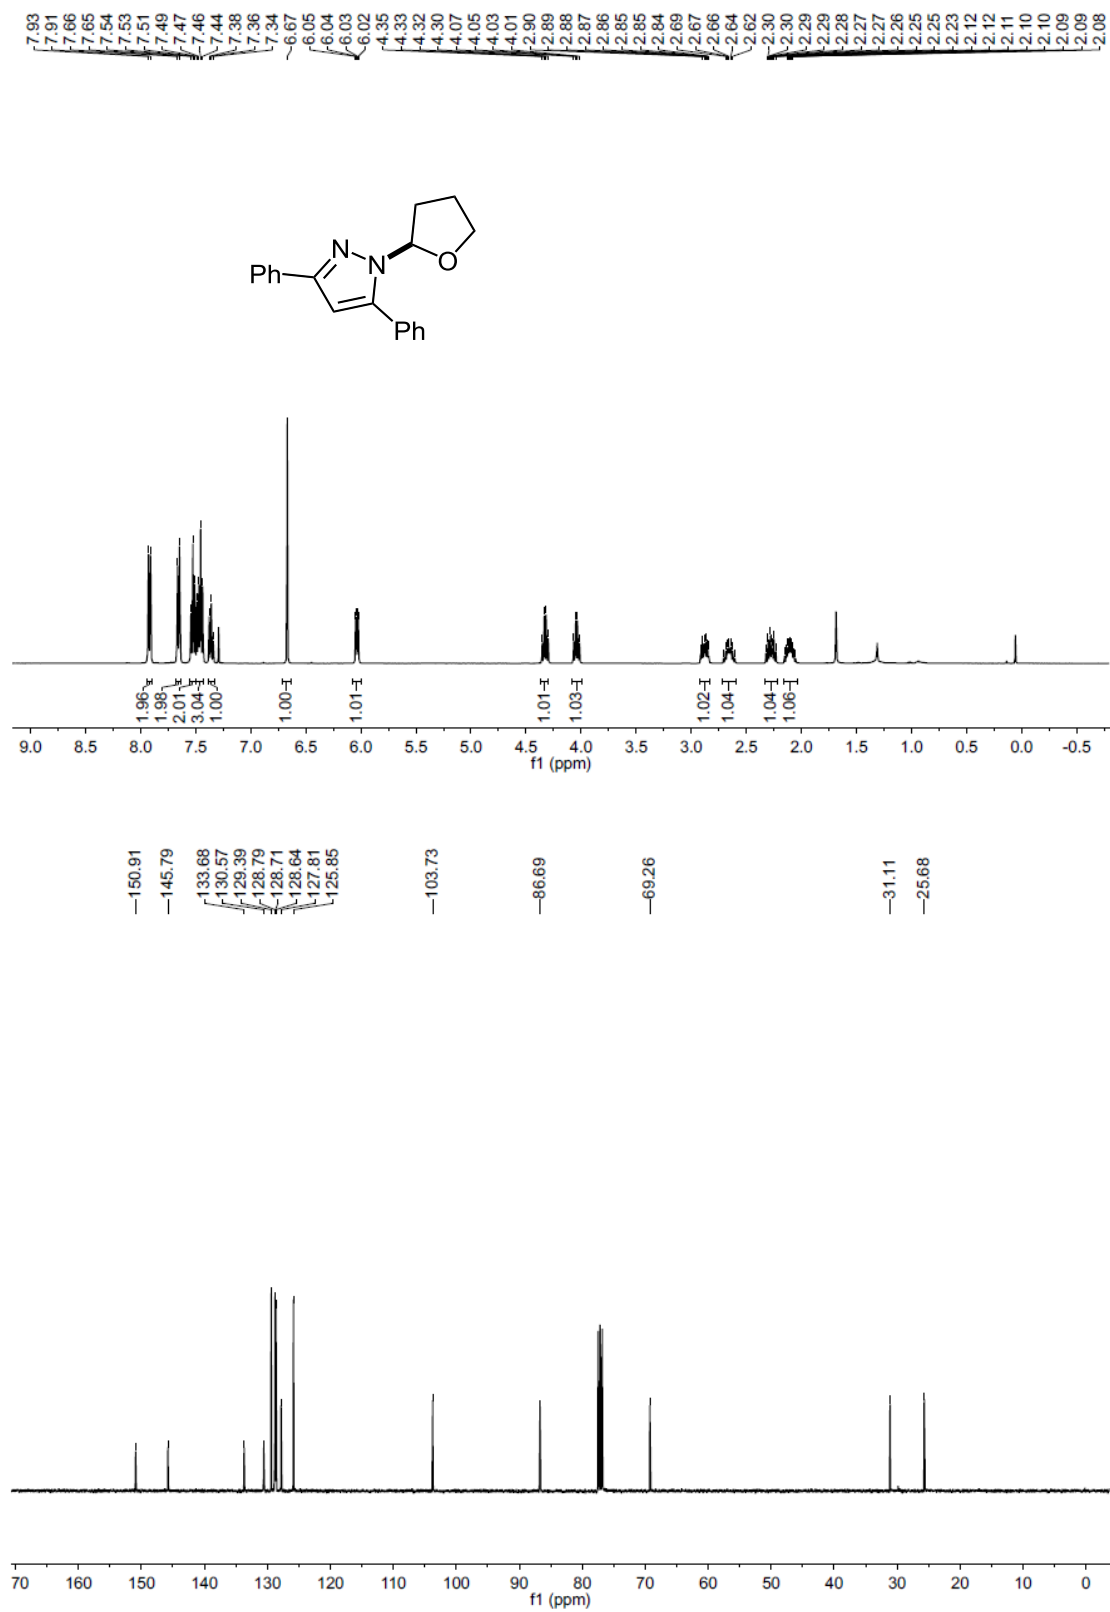

**1-(Tetrahydrofuran-2-yl)-1H-indazole (3n)**

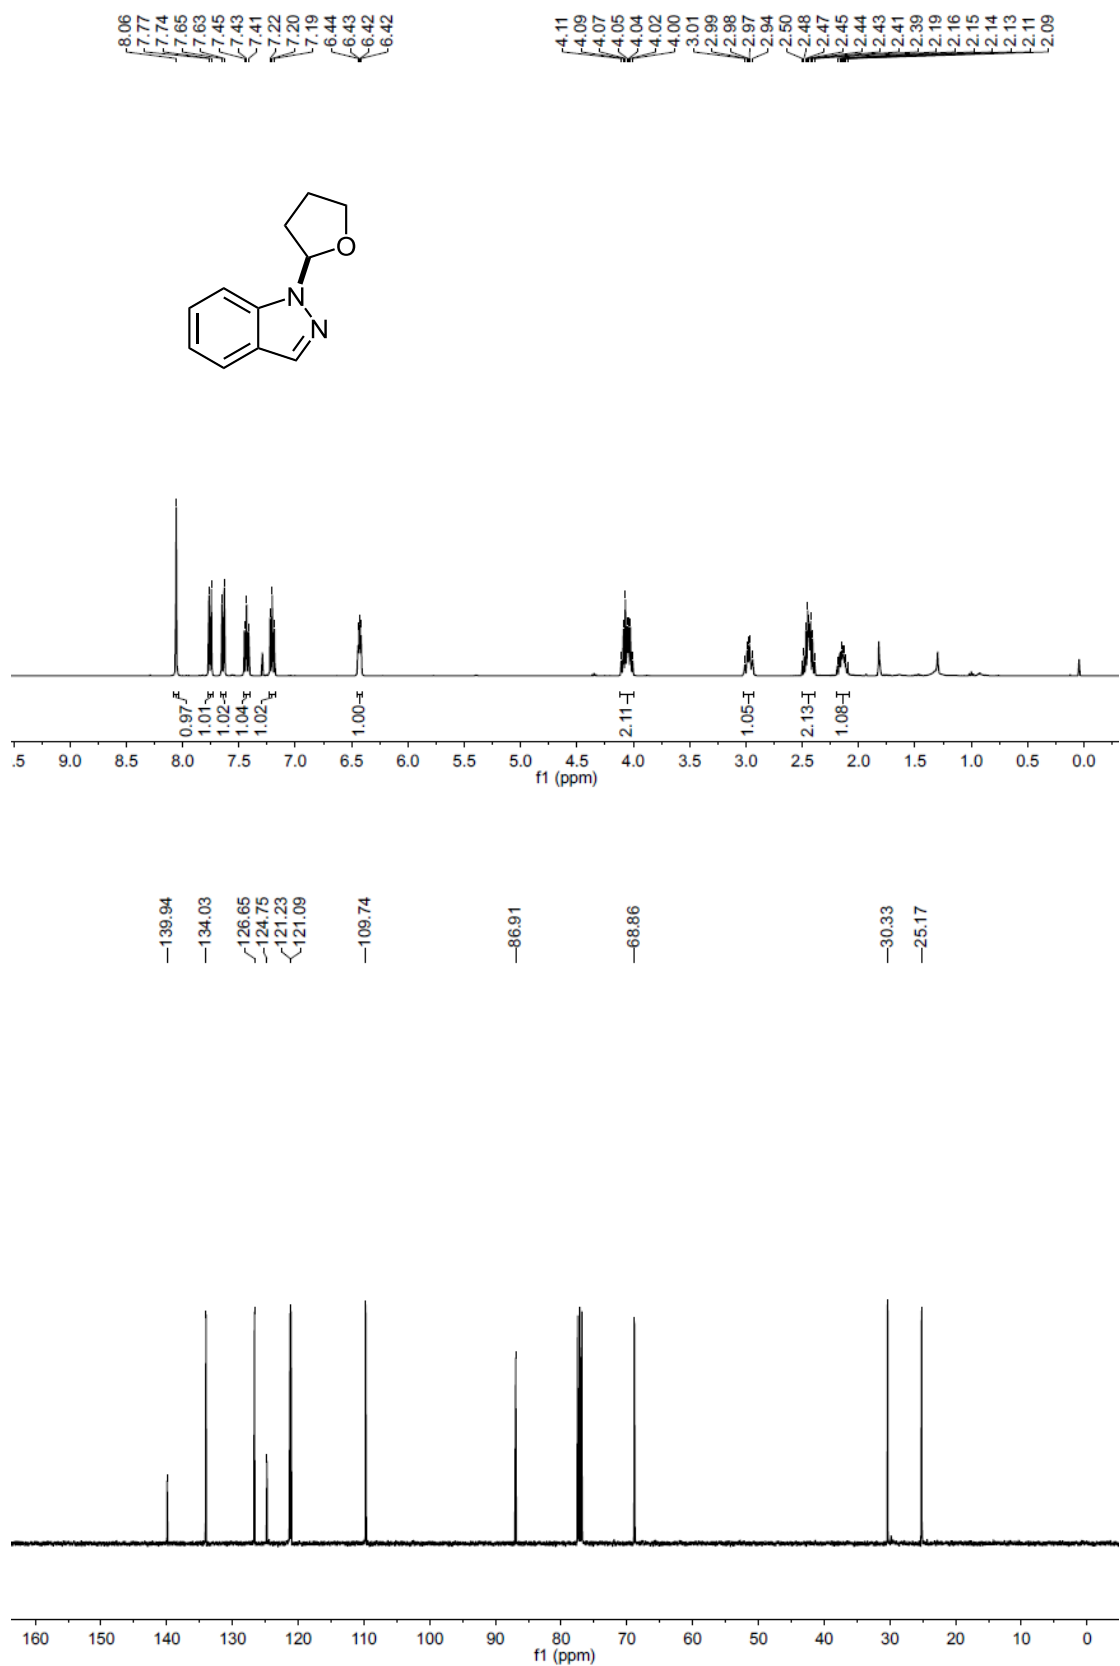

**1-(Tetrahydro-2H-pyran-2-yl)-1H-benzo[d][1,2,3]triazole (3o)**

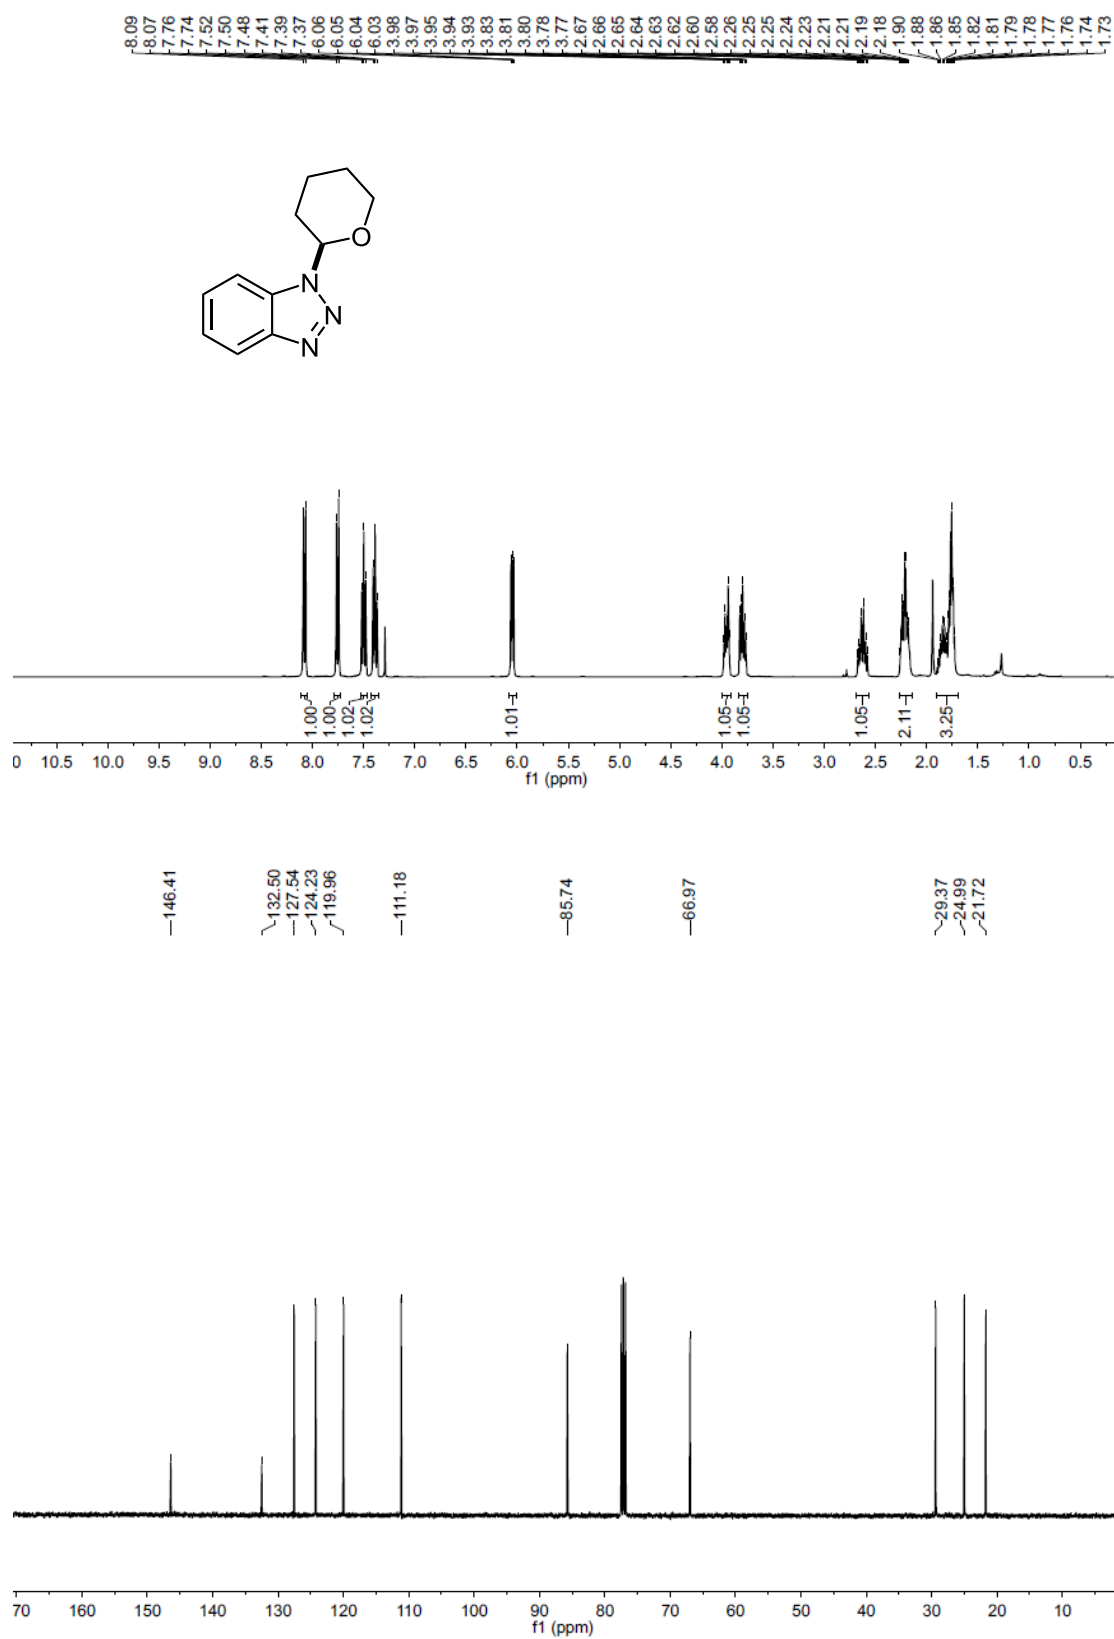

1-(Isochroman-1-yl)-1H-benzo[d][1,2,3]triazole (3p)

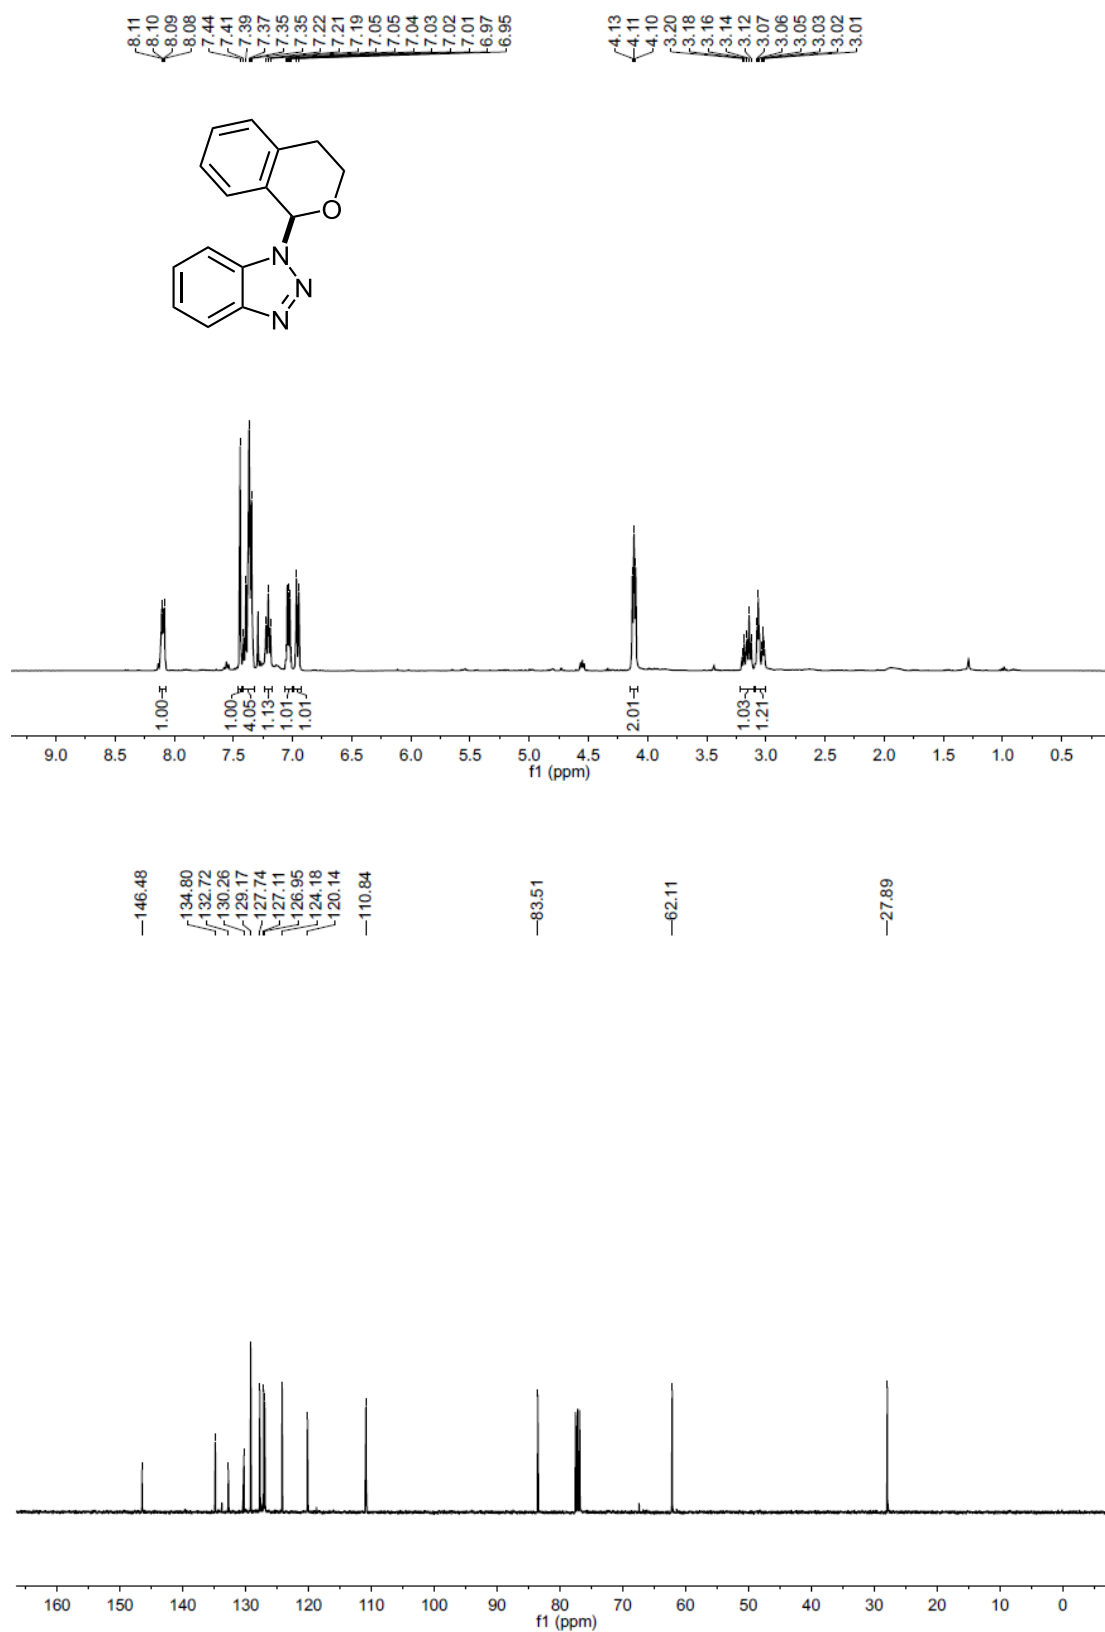

**1-(1-Butoxybutyl)-1H-benzo[d][1,2,3]triazole (3q)**

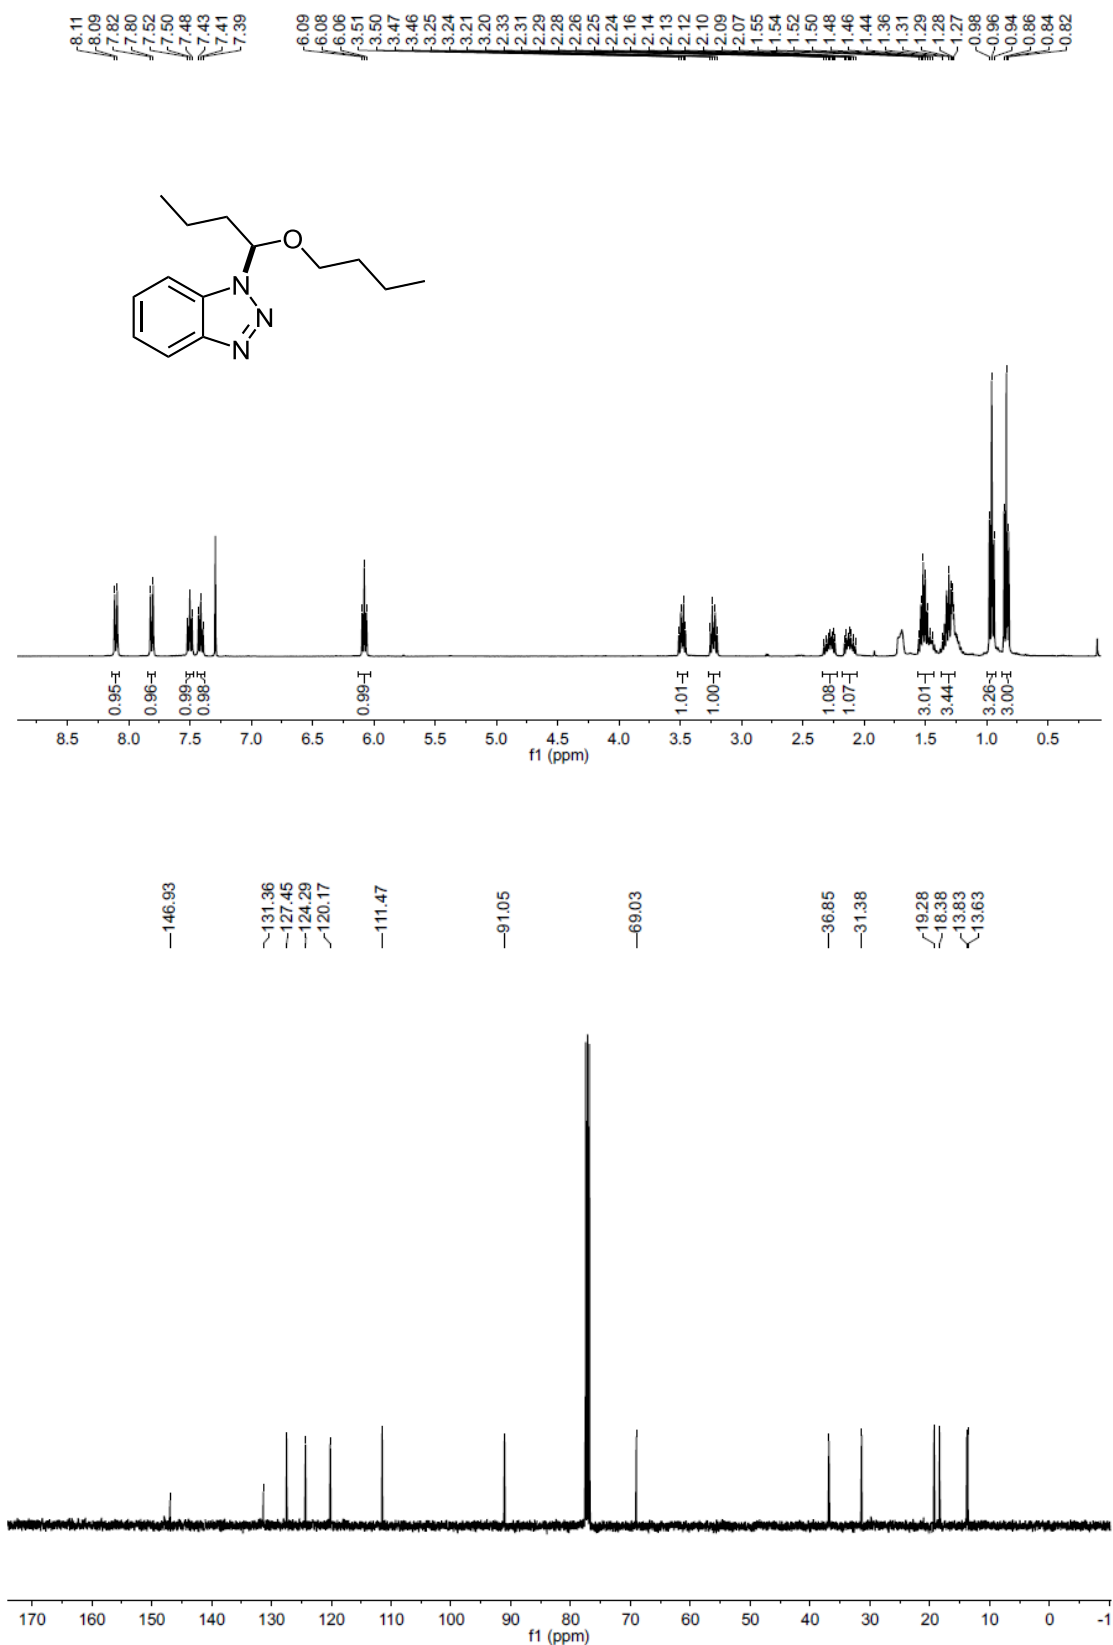

5-(1H-benzo[d][1,2,3]triazol-1-yl)-1-methylpyrrolidin-2-one (3r)

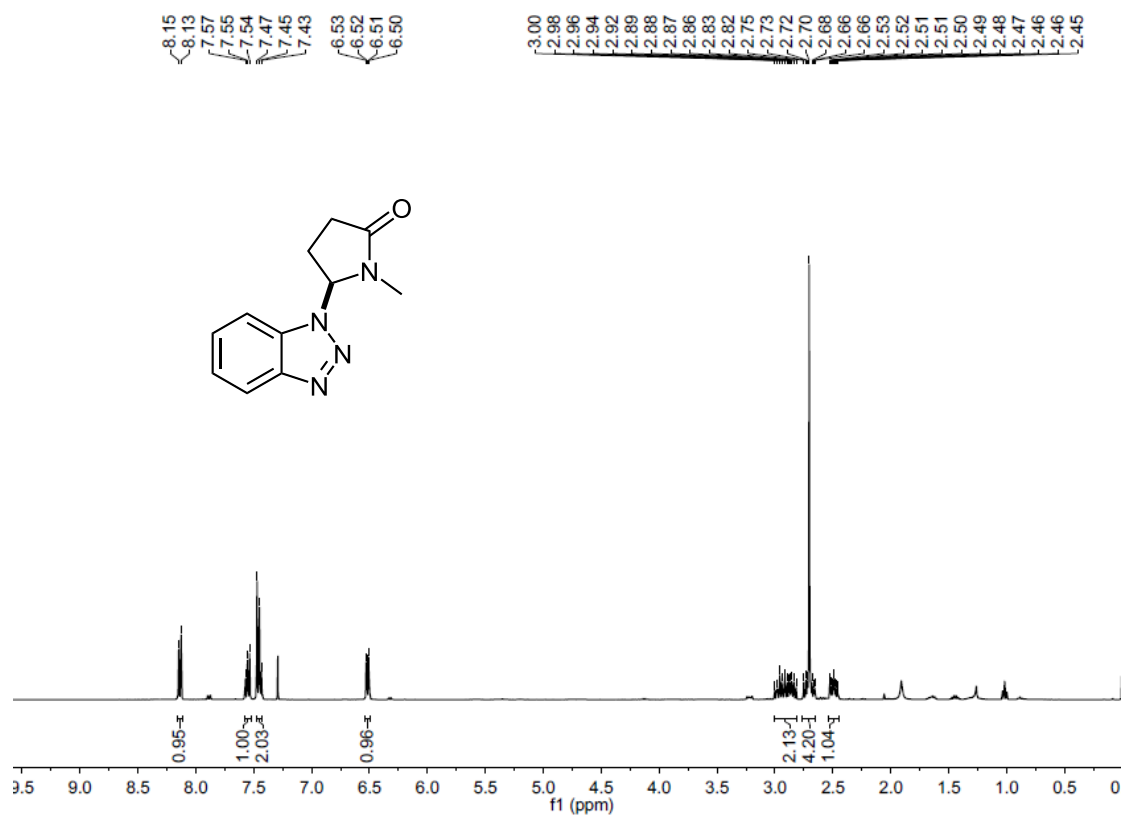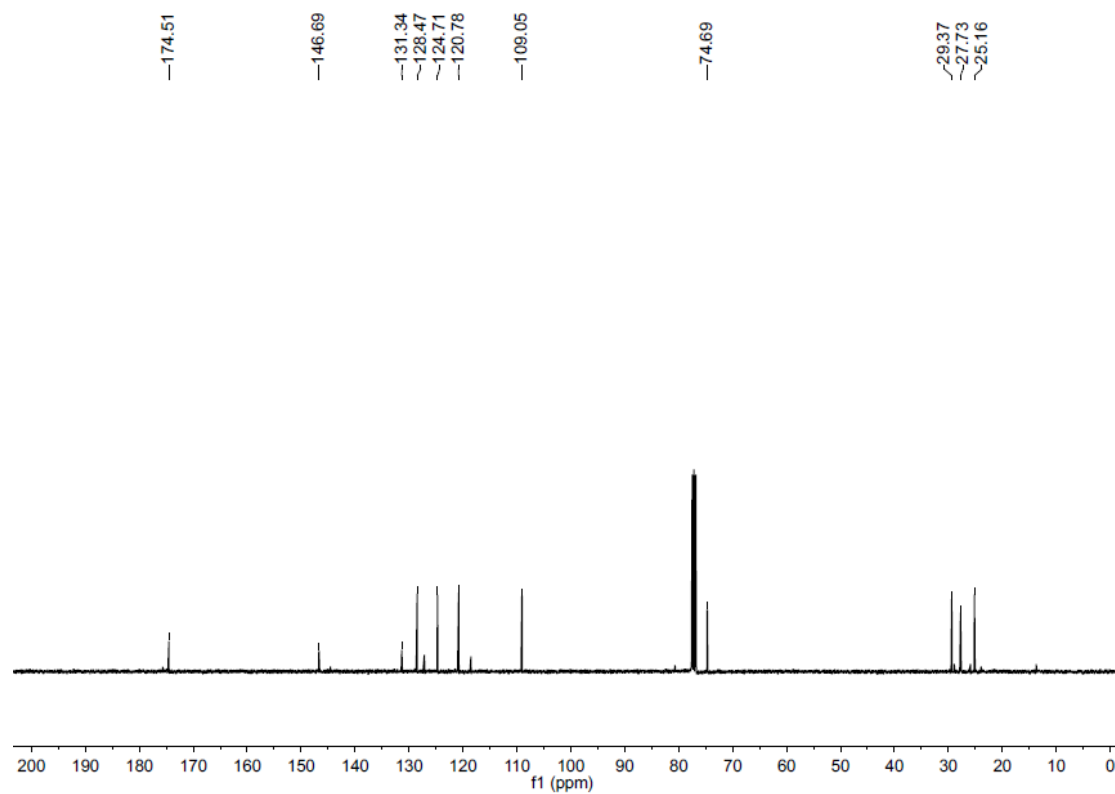



1-(Tetrahydrothiophen-2-yl)-1H-benzo[d][1,2,3]triazole (3s)

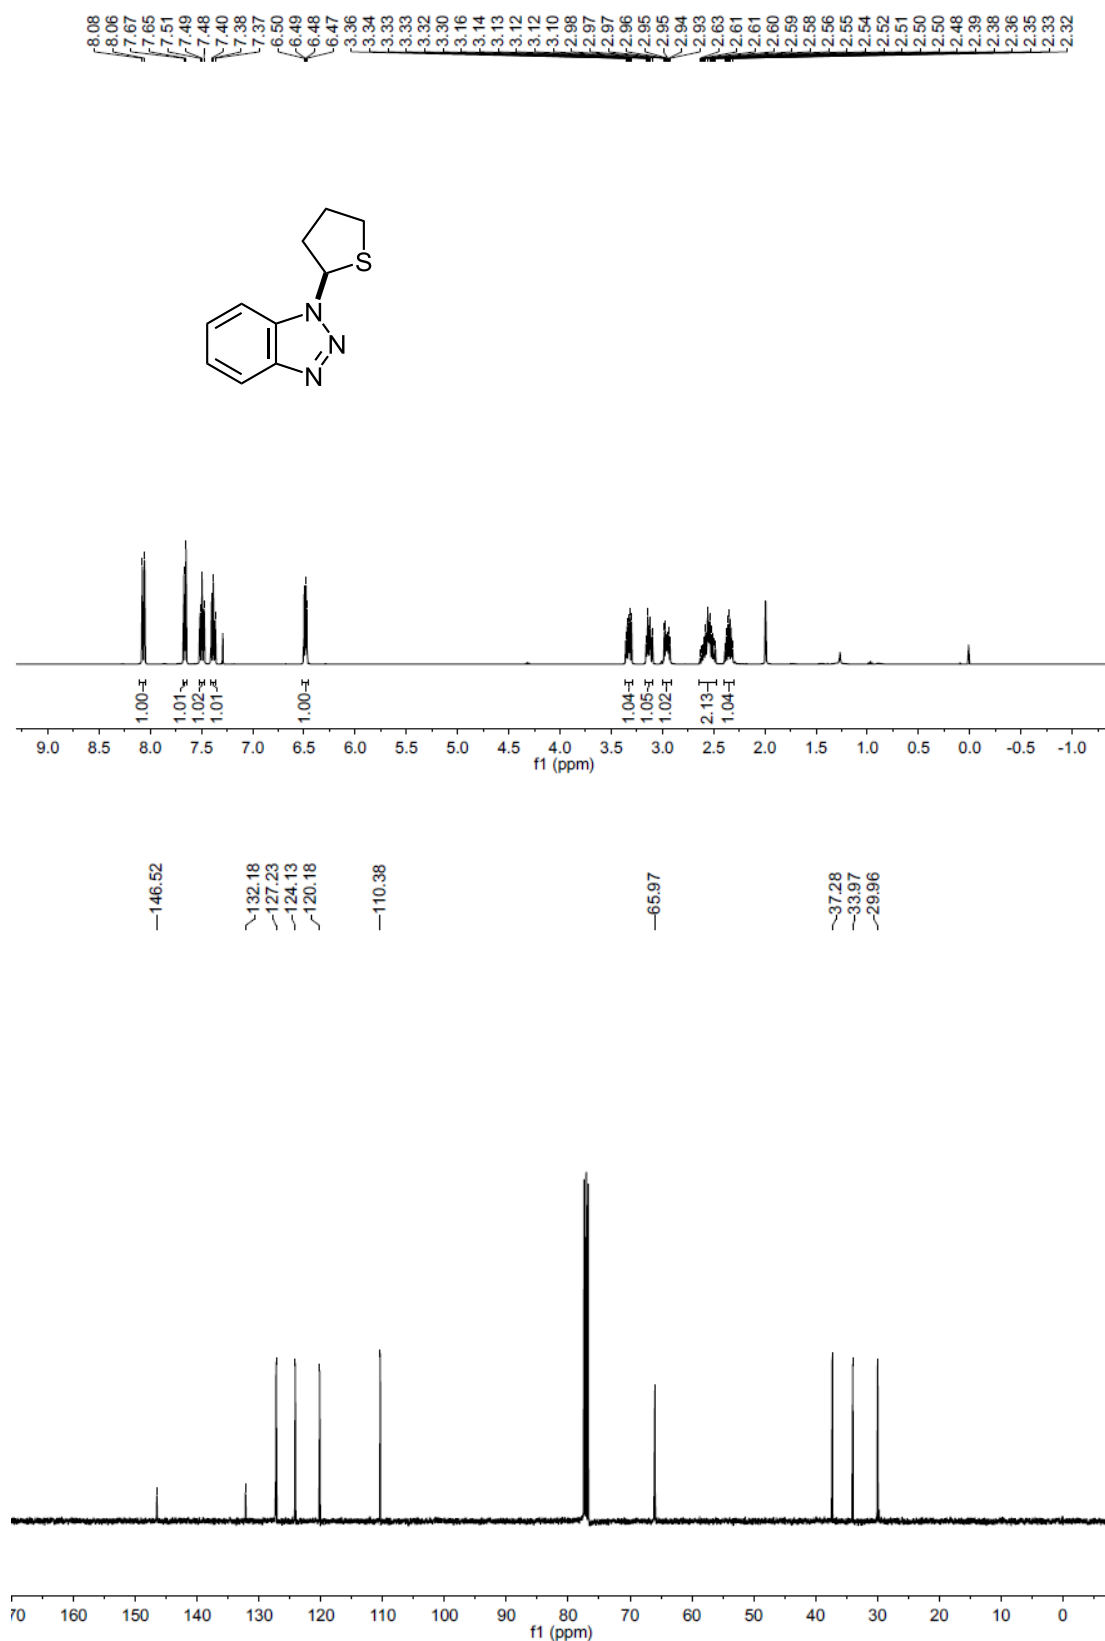

1-(1,4-Oxathian-3-yl)-1H-benzo[d][1,2,3]triazole (3t)

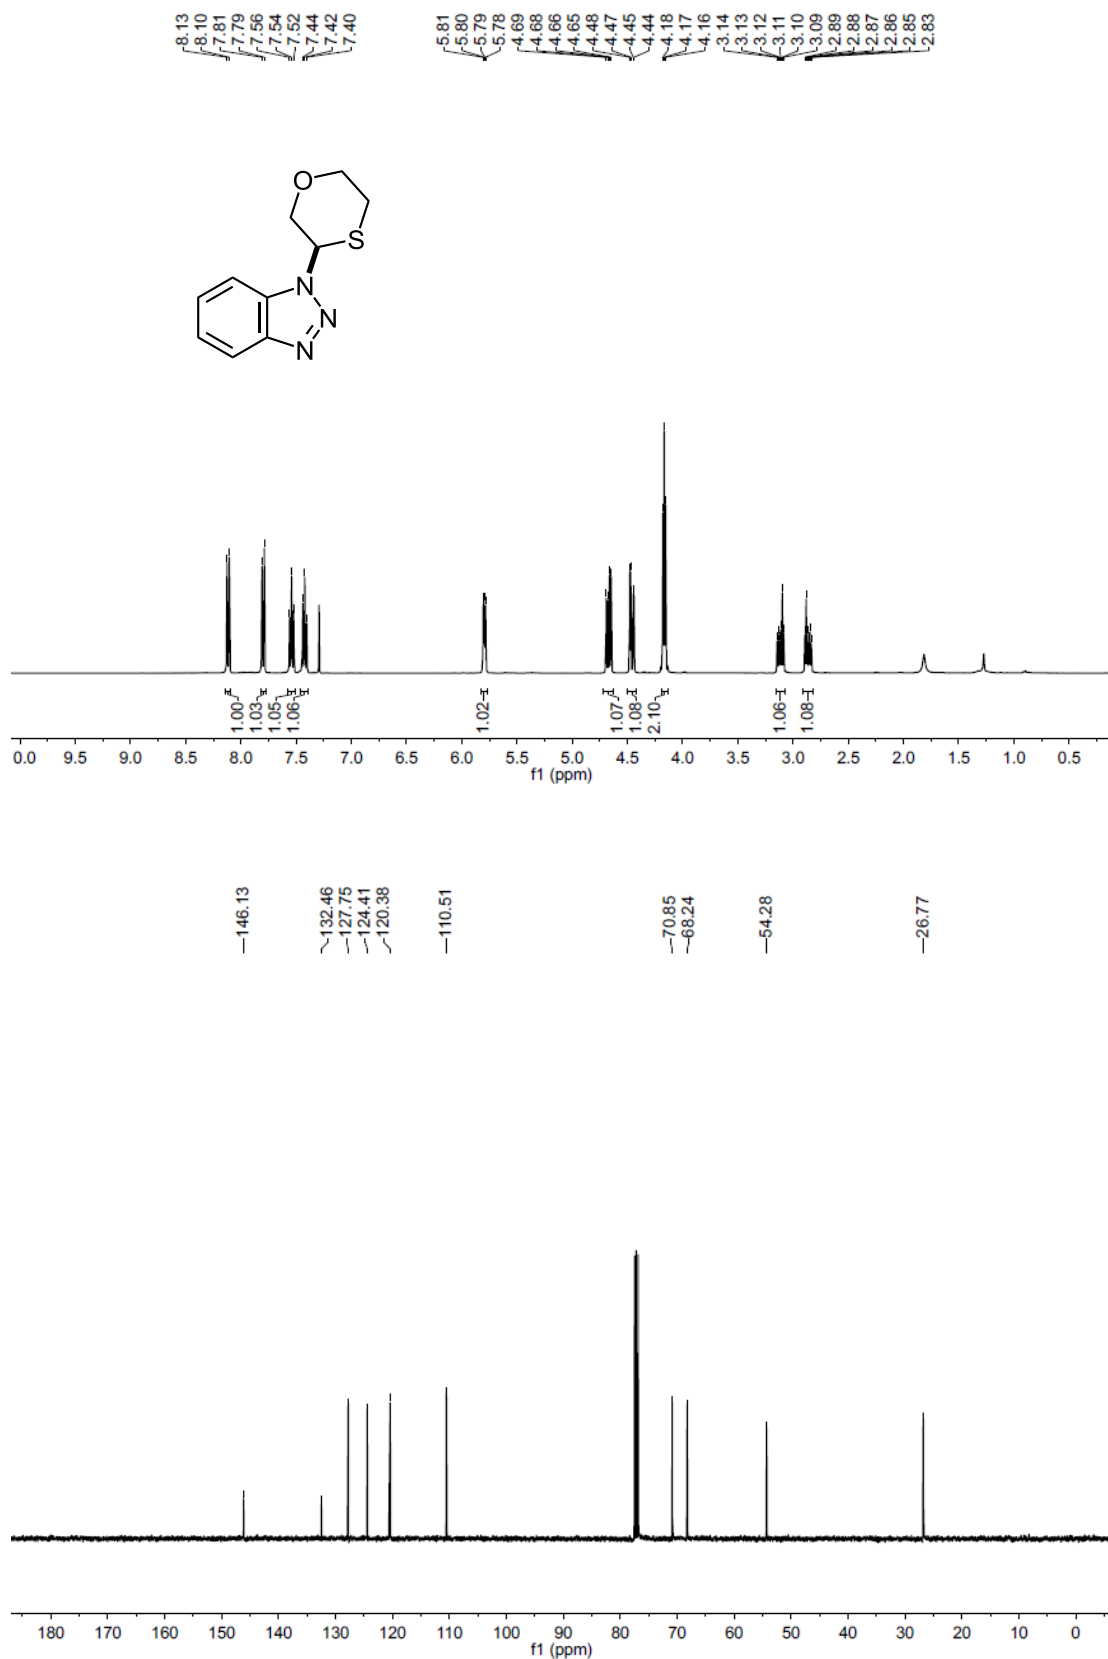

**3-(1H-benzo[d][1,2,3]triazol-1-yl)morpholine-4-carbaldehyde and 2-(1H-benzo[d][1,2,3]triazol-1-yl)morpholine-4-carbaldehyde ( $3u/3u^I = 2.3/1$ )**

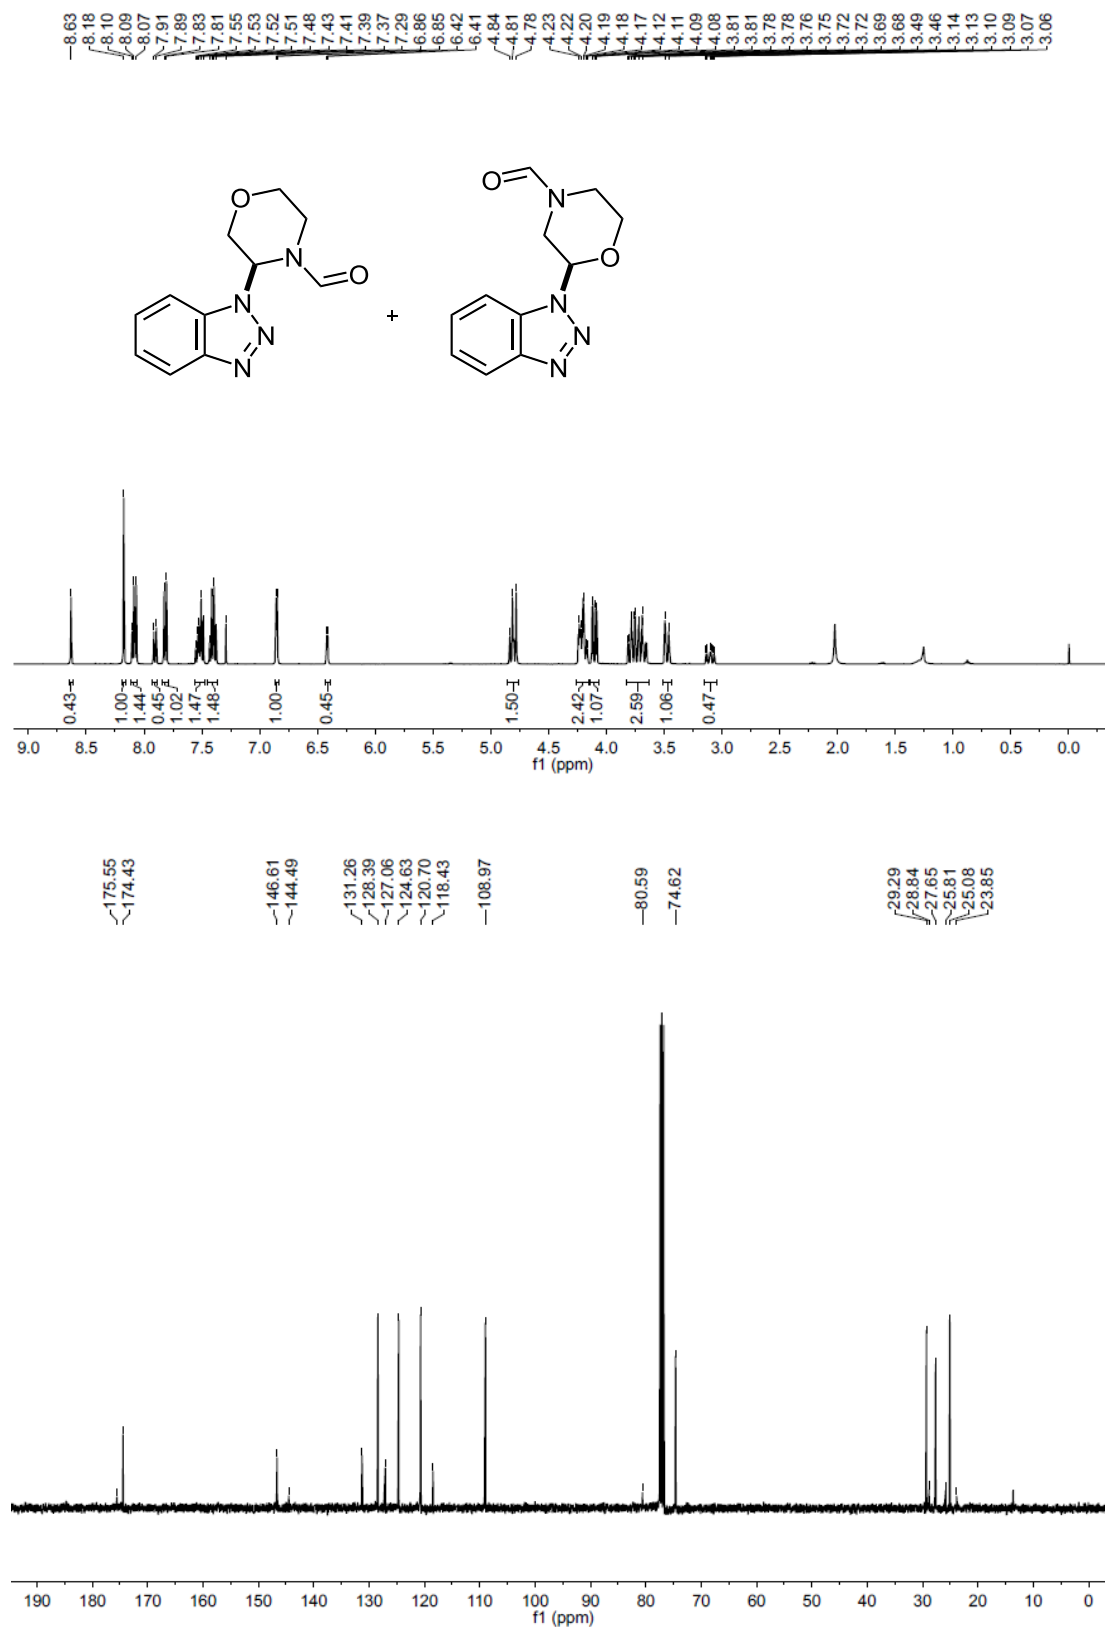

4-((1H-Benzo[d][1,2,3]triazol-1-yl)methyl)-2,6-dimethylphenol (3v)

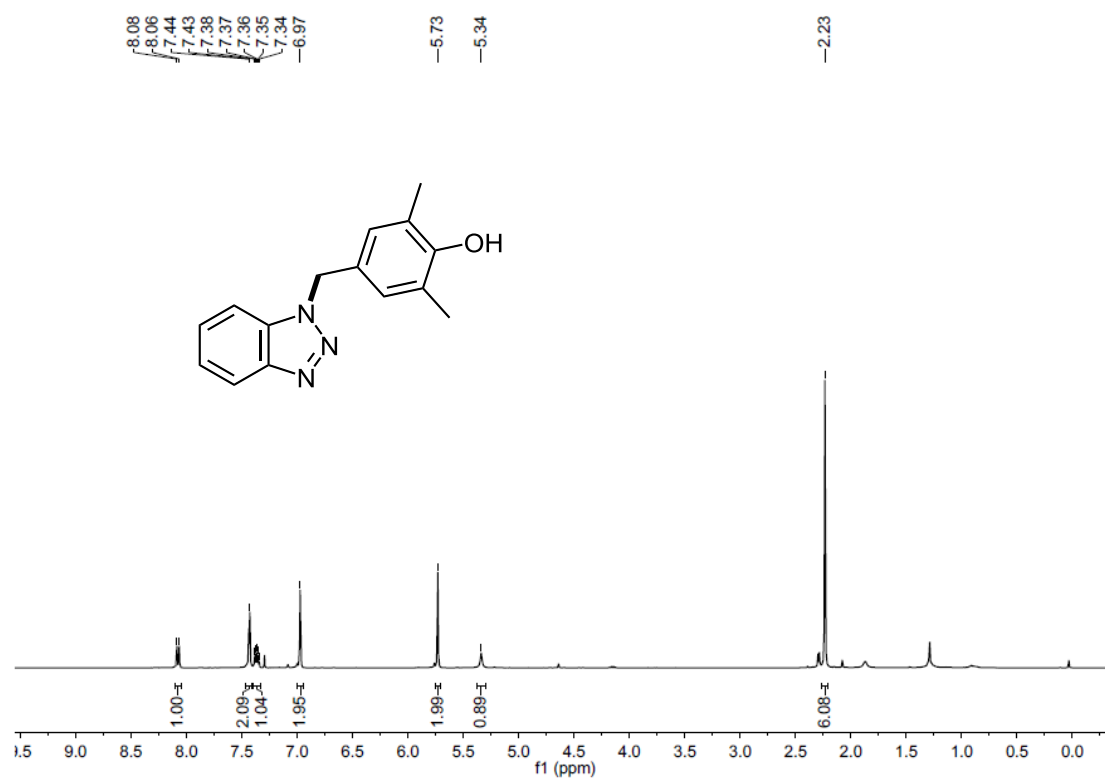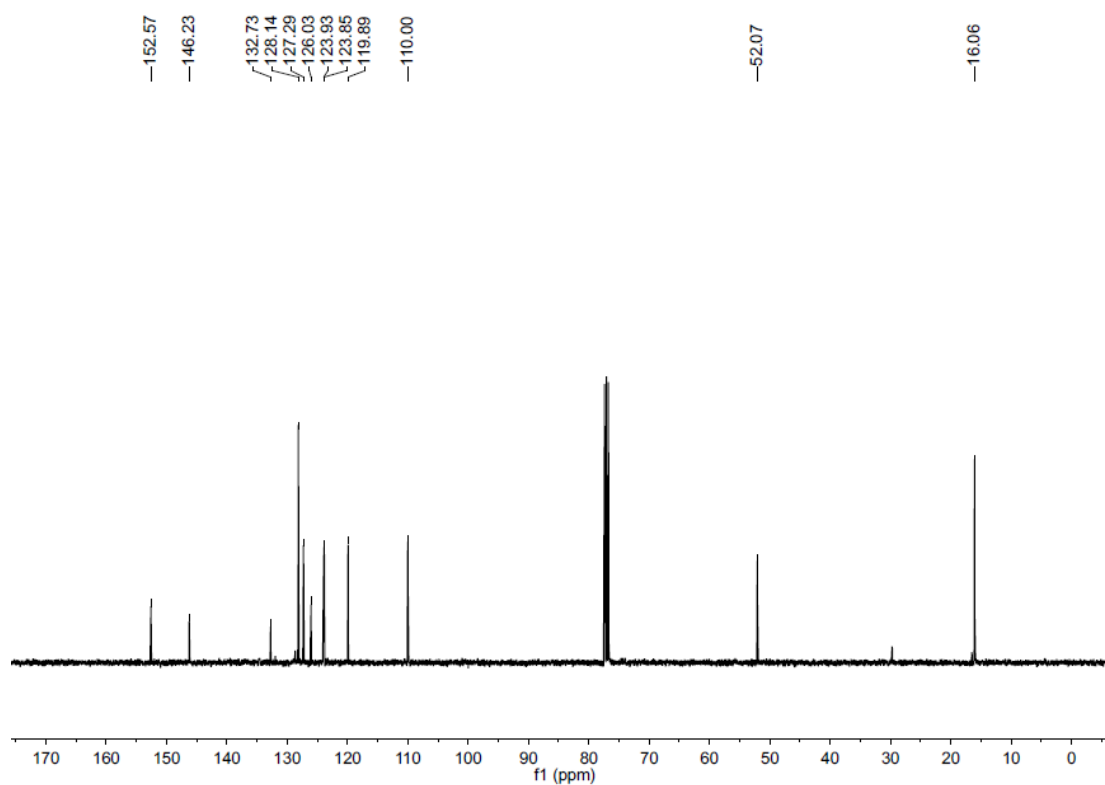

1-(Cyclopent-2-en-1-yl)-1H-benzo[d][1,2,3]triazole (3w)

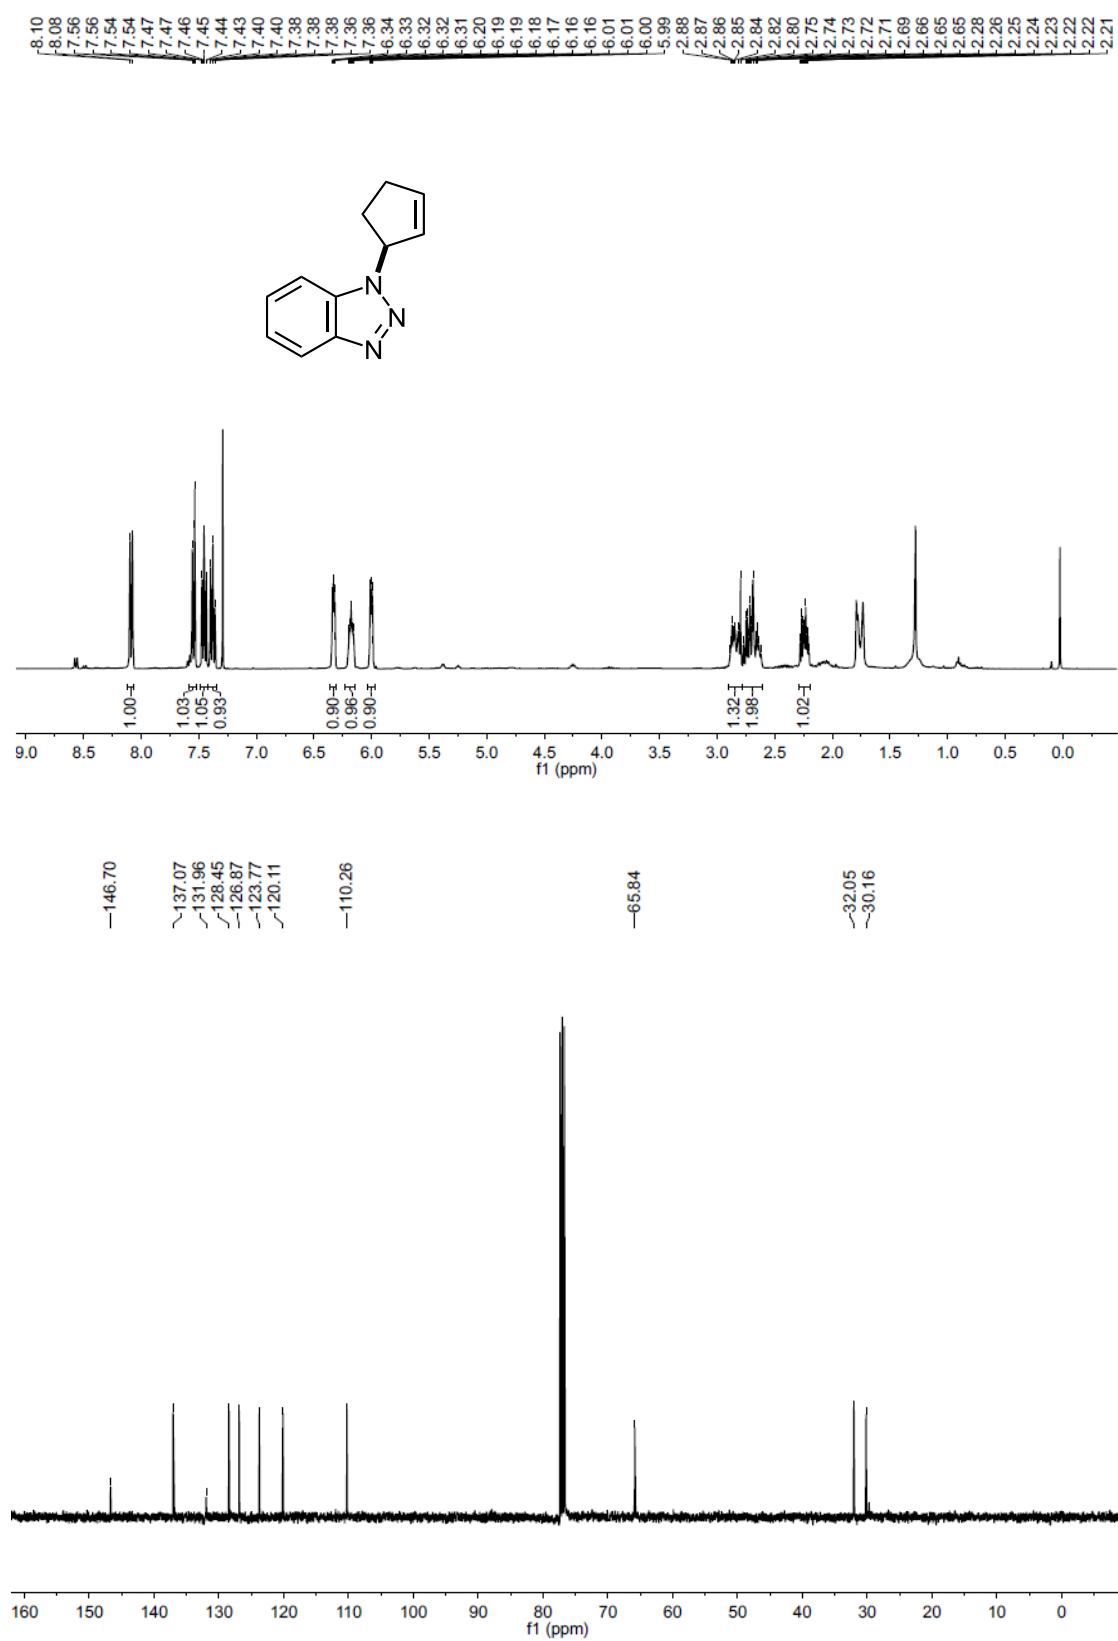

4-((1H-benzo[d][1,2,3]triazol-1-yl)methyl)-2,6-di-tert-butylphenol (5a)

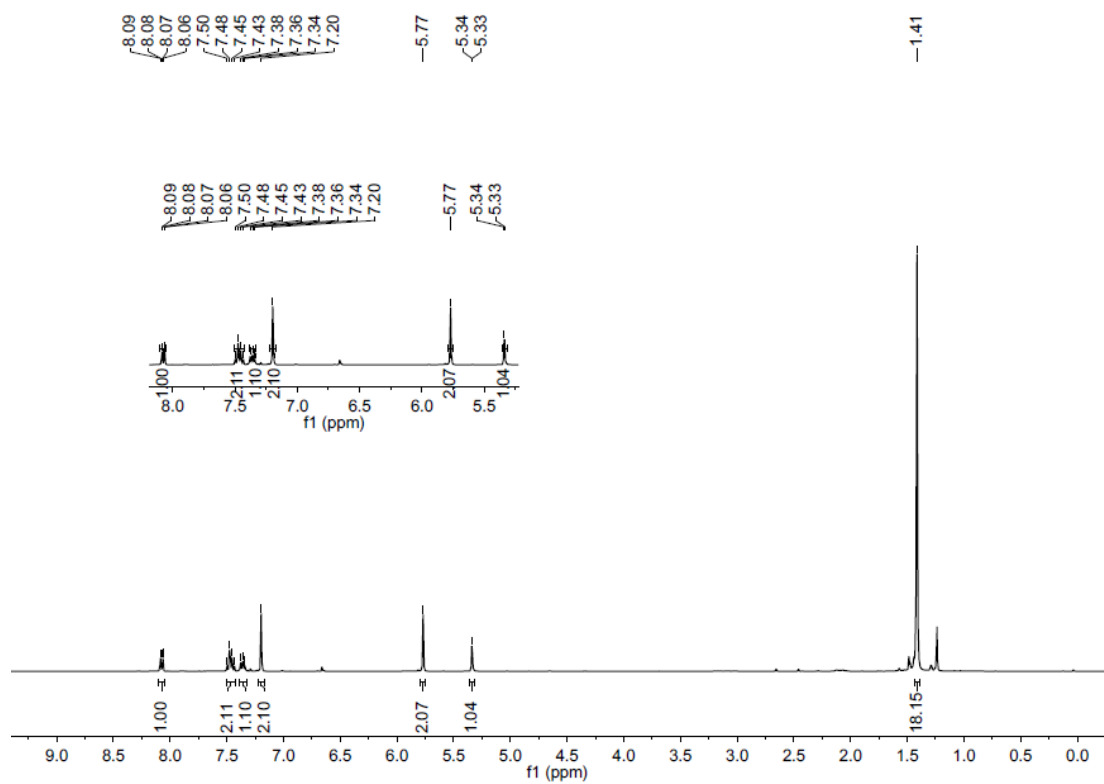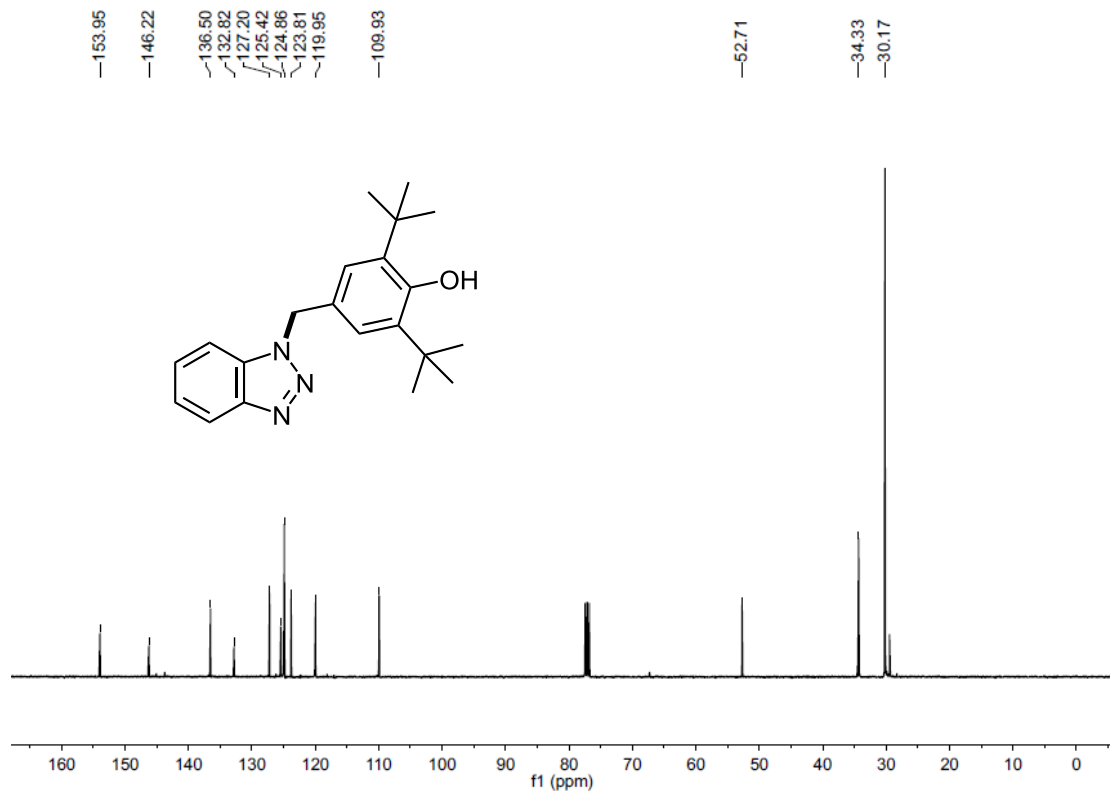

## 7 References

- [1] Singh, M. K.; Akula, H. K.; Satishkumar, S.; Stahl, L.; Lakshman, M. K. *ACS Catal.* **2016**, 6, 1921–1928.
- [2] Wang, L.; Zhu, K.; Wu, W.; Chen, Q.; He, M. *Catal. Sci. Technol.* **2015**, 5, 2891–2896.
- [3] Aruri, H.; Singh, U.; Sharma, S.; Gudup, S.; Bhogal, M.; Kumar, S.; Singh, D.; Gupta, V. K.; Kant, R.; Vishwakarma, R. A.; Singh, P. P. *J. Org. Chem.* **2015**, 80, 1929–1936.
- [4] Sha, Q.; Liu, H.; Wei, Y. *Eur. J. Org. Chem.* **2014**, 79, 7707–7715.
- [5] Sun, J.; Zhang, Y.; Mathan, S.; Wang, Y.; Pan, Y. *J. Org. Chem.* **2016**, 81, 3380–3385.
- [6] Sun, J.; Wang, Y.; Pan, Y. *J. Org. Chem.* **2015**, 80, 8945–8950.
